1 **Periosteum-derived podoplanin-expressing stromal cells regulate nascent vascularization**  
2 **during epiphyseal marrow development**

3  
4 Shogo Tamura <sup>a\*</sup>, Masato Mukaide <sup>a</sup>, Yumi Katsuragi <sup>a</sup>, Wataru Fujii <sup>a</sup>, Koya Odaira <sup>a</sup>, Nobuaki Suzuki  
5 <sup>b</sup>, Shuichi Okamoto <sup>c</sup>, Atsuo Suzuki <sup>c</sup>, Takeshi Kanematsu <sup>c</sup>, Akira Katsumi <sup>d</sup>, Akira Takagi <sup>e</sup>, Katsue  
6 Suzuki-Inoue <sup>f</sup>, Tadashi Matsushita <sup>b,c</sup>, Tetsuhito Kojima <sup>a,g</sup>, Fumihiko Hayakawa <sup>a</sup>

7  
8 <sup>a</sup> Division of Cellular and Genetic Sciences, Department of Integrated Health Sciences, Nagoya  
9 University Graduate School of medicine, Nagoya, Japan

10 <sup>b</sup> Department of Transfusion Medicine, Nagoya University Hospital, Nagoya, Japan

11 <sup>c</sup> Department of Clinical Laboratory, Nagoya University Hospital, Nagoya, Japan

12 <sup>d</sup> Department of Hematology, National Center for Geriatrics and Gerontology, Obu City, Japan

13 <sup>e</sup> Department of Medical Technology, Shubun University, Ichinomiya, Japan

14 <sup>f</sup> Department of Clinical and Laboratory Medicine, Faculty of Medicine, University of Yamanashi,  
15 Chuo, Yamanashi, Japan.

16 <sup>g</sup> Aichi Health Promotion Foundation, Nagoya, Japan

17  
18 **\* Corresponding author**

19 Shogo Tamura, Ph.D.

20 Division of Cellular and Genetic Sciences, Department of Integrated Health Sciences, Nagoya  
21 University Graduate School of Medicine, 1-1-20 Daiko-Minami, Higashi-ku, Nagoya 461-8673, Japan

22 Tel/Fax: +81 52 719 1340, E-mail: [stamura@met.nagoya-u.ac.jp](mailto:stamura@met.nagoya-u.ac.jp)

23

24

1 **Abstract**

2 Bone marrow development and endochondral bone formation occur simultaneously. During  
3 endochondral ossification, periosteal vasculatures and stromal progenitors invade the primary  
4 avascular cartilaginous anlage; this induces primitive marrow development. We previously  
5 determined that bone marrow podoplanin (PDPN)-expressing stromal cells exist in a perivascular  
6 microenvironment, and promote megakaryopoiesis and erythropoiesis. In this study, we aimed to  
7 examine the involvement of PDPN-expressing stromal cells in the postnatal bone marrow generation.  
8 We found that periosteum-derived PDPN-expressing stromal cells regulate vascularization during  
9 postnatal epiphyseal marrow development. Our findings suggest that these cells act as pericytes on  
10 the primitive vasculature of the nascent marrow. They invade the cartilaginous epiphysis and regulate  
11 marrow development and homeostasis by maintaining vascular integrity. To the best of our  
12 knowledge, this is the first study to comprehensively examine how PDPN-expressing stromal cells  
13 contribute to marrow development and homeostasis.

14

1 **Keywords**

2 Bone marrow development

3 Secondary ossification center

4 PDPN-expressing stromal cell

5 Skeletal stem cell

6

7

## 1 **Main**

2           The bone marrow is a three-dimensional tissue within the bone cavity that is composed of  
3 vasculature, extracellular matrices (ECMs), and stromal cells<sup>1,2</sup>. Bone marrow development and  
4 bone formation occur simultaneously. In mammals, bones are formed via two distinct mechanisms,  
5 i.e., intramembranous and endochondral ossification. Intramembranous ossification is the process of  
6 bone development from soft connective tissue that is involved in the formation of flat bones of the  
7 skull (calvarial bones and mandibles) and part of the clavicles. Endochondral ossification is the  
8 process of bone development from cartilage that forms all bones of the body, except the flat bones of  
9 the skull. During the endochondral ossification, the vascular invasion of the primary avascular  
10 cartilaginous anlage triggers the formation of an embryonal primary ossification center (POC) and  
11 postnatal secondary ossification center (SOC) in the diaphysis and epiphysis, respectively<sup>3</sup>. The  
12 invading vasculature transports chondroclasts, osteoblast progenitors, and stromal progenitors from  
13 the periosteum to the POC or SOC<sup>4,5</sup>. The invading vasculature and stromal progenitors generate the  
14 primitive marrow inside the bone cavity.

15           Skeletal stem cells (SSCs) are a heterogenous population of stromal cells that play a role in  
16 bone marrow generation, skeletal tissue development, homeostasis, and regeneration<sup>6,7</sup>. In mice,  
17 SSCs exist within the periosteum (P-SSCs)<sup>8-11</sup>, bone marrow (BM-SSCs, also known as bone  
18 marrow stem/stromal cells, BMSCs)<sup>12-23</sup>, and growth plate resting zone (GP-SSCs)<sup>24,25</sup>. Studies  
19 involving mouse BM-SSCs have identified several BM-SSC subpopulations [e.g., CXCL12

1 abundant reticular cells (CAR cells)<sup>12-15</sup>, leptin receptor-positive cells<sup>16-18</sup>, *nestin*<sup>GFP</sup>-positive cells<sup>21</sup>,  
2 <sup>22</sup>, *grem1*<sup>Cre-ERT</sup>-positive cells<sup>20</sup>, and Mx1-positive cells<sup>11, 19</sup>]. These BM-SSC subsets are present at  
3 the abluminal surface of blood vessels and induce the formation of hematopoietic microenvironments  
4 via the expression of hematopoietic regulators, such as CXCL12 and SCF<sup>26, 27</sup>. Previously, we have  
5 identified podoplanin (PDPN, also known as gp38 or T1a)-expressing stromal cells that existed in the  
6 bone marrow<sup>28</sup>. In adult mice, PDPN-expressing stromal cells induce the generation of a perivascular  
7 microenvironment that promotes megakaryopoiesis and erythropoiesis<sup>28, 29</sup>. However, the cellular  
8 sources and physiological functions of PDPN-expressing stromal cells during postnatal bone marrow  
9 development have not been elucidated.

10           The aim of this study was to characterize the cellular features of marrow PDPN-expressing  
11 stromal cells and disclose how these cells are involved in the postnatal bone marrow generation. To  
12 the best of our knowledge, this is the first study to investigate the role of PDPN-expressing stromal  
13 cells on marrow development and homeostasis. These study findings will improve our understanding  
14 of how stromal cells regulate the nascent bone marrow development and homeostasis.

15

## 1 **Results**

### 2 **PDPN-expressing periosteal cells invade into the postnatal primary epiphysis and are present** 3 **in primitive vascular beds**

4 We and other research group (Baccin C et al) had previously detected PDPN-expressing  
5 stromal cells in the diaphyseal marrow of adult mice (> 8-week old)<sup>28,30</sup>. In the present study, to  
6 investigate the source of PDPN-expressing stromal cells and their physiological functions in the  
7 postnatal nascent bone marrow, we attempted to screen their distribution in mice femurs at postnatal  
8 day 21 (P21). Because the number of PDPN-expressing stromal cells in the marrow was very low,  
9 we enriched PDPN-positive marrow cells using magnetic microbeads (Fig. 1a). Using flow  
10 cytometric analysis, we detected the PDPN-expressing stromal cells in the diaphyseal and epiphyseal  
11 marrow (Fig. 1b). In the stromal population of the PDPN-positive enriched marrow  
12 [Lin(-)CD31(-)CD45(-)CD51(+), more PDPN-expressing stromal cells were detected in  
13 the epiphysis than in the diaphysis. The diaphyseal PDPN-expressing stromal cells were stem cell  
14 antigen-1 (Sca-1)-negative; these findings were consistent with those of our previous study<sup>28</sup>. In  
15 contrast, the epiphyseal PDPN-expressing stromal cells were mainly Sca-1 positive. These data  
16 indicate the characteristic differences between the epiphyseal and diaphyseal PDPN-expressing  
17 stromal cells. To analyze these newly identified cells, we evaluated the epiphyseal marrow using  
18 histological analysis. At P21—in the cryosection of the epiphysis—PDPN-expressing stromal cells  
19 were detected in the SOC and surrounding primitive vasculatures (Fig. 1c). Upon evaluating the

1 expression of pericyte markers, platelet-derived growth factor receptor  $\beta$  (PDGFR $\beta$ ), neuron-gial  
2 antigen 2 (NG2), and alpha smooth muscle actin ( $\alpha$ SMA)<sup>31</sup>, in these cells, we found that the  
3 epiphyseal marrow PDPN-expressing stromal cells were PDGFR $\beta$  positive, NG2 positive, and  
4  $\alpha$ SMA negative (Fig. 1d-f). The pericytes, determined to be PDGFR $\beta$ (+)NG2(+) $\alpha$ SMA(-), are  
5 generally found on the capillary bed<sup>32</sup>. These findings indicate that epiphyseal PDPN-expressing  
6 stromal cells can act as pericytes in primitive capillary-like vascular beds in the developing SOC.

7         Next, we investigated how PDPN-expressing stromal cells populated the epiphyseal  
8 marrow. We sequentially chased epiphyseal SOC development from P7 to P14 (Fig. 2). At P7, the  
9 periosteal artery invaded into the epiphysis. At this time, PDPN-expressing cells were mainly  
10 observed within the periosteum, and some were detected within the vascular tip penetrating the  
11 epiphyseal cartilaginous anlage (Fig. 2a). SOC formation and vascularization was initiated at P9.  
12 During this process, PDPN-expressing stromal cells began to associate with vascular endothelial  
13 cells (Fig. 2b). The SOC became highly vascularized from P10 to P14. PDPN-expressing stromal  
14 cells were widely infiltrated in the SOC and were present in the primitive vasculature (Fig. 2c-g).  
15 Moreover, during SOC formation, the proliferative expansion of these cells occurred at the  
16 penetrating tip of the periosteum (Fig. S1). These findings reveal that epiphyseal PDPN-expressing  
17 stromal cells originate from the periosteal cellular component, populate the epiphyseal SOC, and act  
18 as pericytes.

19

## 1 **Epiphyseal PDPN-expressing stromal cells are progeny cells of the SSC lineage**

2 To clarify the cellular characteristics of epiphyseal PDPN-expressing stromal cells, we  
3 investigated their potential to act as SSCs. Chan et al.<sup>25</sup> established a flowcytometric strategy to  
4 fractionate SSCs [Lin(-)CD31(-)CD45(-)CD51(+)-CD90(-)CD249(-)CD200(+)-CD105(-)] and SSC-  
5 lineage progenitors [pre-bone cartilage stroma progenitors (preBCSPs),  
6 Lin(-)CD31(-)CD45(-)CD51(+)-CD90(-)CD249(-)CD200(-)CD105(-)]. We used this strategy to  
7 investigate whether epiphyseal PDPN-expressing stromal cells are detected in the SSC or preBCSP  
8 fractions. The flowcytometric analysis detected a minor population of epiphyseal PDPN-expressing  
9 stromal cells in SSCs and preBCSPs (Fig. 3a and b). The percentages of PDPN-expressing stromal  
10 cells in each fraction were  $0.202 \pm 0.020\%$  and  $2.189 \pm 0.309\%$  in the SSCs and preBCSPs,  
11 respectively (Fig. 3c). The colony formation assay revealed that the clonogenicity of the epiphyseal  
12 PDPN-expressing stromal cells was significantly lower than that of primary SSCs and preBCSPs  
13 (Fig. 3d). *In vitro* osteo/adipo/chondrogenic differentiation assays showed that epiphyseal PDPN-  
14 expressing stromal cells had the potential to differentiate into adipocytes and chondrocytes, but not  
15 osteoblasts (Fig. 3e). These findings suggest that epiphyseal PDPN-expressing stromal cells partially  
16 exhibit an SSC-lineage phenotype.

17 To confirm their cell lineage, we cultured the primary SSCs with MesenCult and observed  
18 the PDPN expression levels. In this experiment, primary SSCs were isolated from the epiphysis at  
19 P21, which probably contained P-SSCs as a major fraction and GP-SSCs as a minor fraction. During



1 their culture with MesenCult, epiphyseal primary SSCs differentiated into skeletal lineage-  
2 progenitors, including preBCSPs (CD51+CD90-CD249-CD200-CD105-), BCSPs (CD51+CD90-  
3 CD249-CD200-CD105+), osteo/chondrogenic progenitors (OC progenitors, CD51+CD90+), and  
4 stromal cells (CD51+CD90-CD249+) (Fig. 4a). These *in vitro* differentiated SSC progenies  
5 expressed PDPN and Sca-1 at high levels (Fig. 4b). To characterize the PDPN-expressing SSC  
6 progenies *in vitro*, we further investigated their surface markers and compared them with those of  
7 epiphyseal PDPN-expressing stromal cells. Immunocytochemistry (ICC) showed that PDPN-  
8 expressing SSC progenies expressed PDGFR $\beta$  and NG2, but not  $\alpha$ SMA (Fig. 4c-e), and exhibited a  
9 surface marker pattern observed in epiphyseal PDPN-expressing stromal cells (Fig. 1d-f). These  
10 observations suggest that epiphyseal PDPN-expressing stromal cells were derived from SSCs.

11

### 12 **PDPN-expressing SSC progenies maintain the HUVEC lumens via the release of angiogenic** 13 **factors in the xenovascular model**

14 Because epiphyseal PDPN-expressing stromal cells acted as pericytes in the SOC *in vivo*,  
15 we hypothesized that these cells could regulate vascular integrity and/or marrow homeostasis. To  
16 verify this hypothesis, we used *in vitro* PDPN-expressing SSC progenies as a cellular model of *in*  
17 *vivo* epiphyseal PDPN-expressing stromal cells. In addition, we established a xenovascular model by  
18 co-culturing Human umbilical vein endothelial cells (HUVECs) with *in vitro* PDPN-expressing SSC  
19 progenies. In the xenovascular model, non-endothelial cells with fibroblastic morphologies were

1 attached onto HUVEC vascular-like cords (Fig. 5a). ICC revealed that these pericyte-like cells  
2 expressed PDPN, PDGFR $\beta$ , and NG2, but not VE-cadherin (Fig. 5b-d). These observations indicate  
3 that *in vitro* PDPN-expressing SSC progenies acted as pericytes surrounding the HUVEC cords, and  
4 mimicked epiphyseal PDPN-expressing stromal cells present on the primitive vascular beds in the  
5 SOC. Next, we investigated whether SSC progenies expressing PDPN *in vitro* maintained HUVEC  
6 lumens. Compared to the conditions used for the monoculture of HUVECs, the parameters used to  
7 evaluate HUVEC lumen integrity (the number of junctions, the number of segments, the number of  
8 meshes, and the total mesh area) were significantly maintained in the xenovascular-model. (Fig. 5e-  
9 i). Moreover, the luminal regulation of PDPN-expressing SSC progenies was sustained for at least 6  
10 days (Fig. S2). These observations indicate that PDPN-expressing SSC progenies consolidate the  
11 HUVEC lumens *in vitro*.

12 To investigate the mechanism of vascular regulation by *in vitro* PDPN-expressing SSC  
13 progenies, we analyzed soluble factors in conditioned medium derived from PDPN-expressing SSC  
14 progenies (SSC-progeny CM). The HUVEC proliferation assay showed that SSC-progeny CM  
15 significantly accelerated cell proliferation (Fig. 6a). The proliferative activity was much higher than  
16 that of the commercially available endothelial cell growing medium (EGM2). Scratch assays  
17 revealed that SSC-progeny CM also facilitated HUVEC migration (Fig. 6b). Therefore, we  
18 investigated whether SSC-progeny CM consolidated the HUVEC lumens. When compared to the  
19 non-conditioned medium (Non-CM), the SSC-progeny CM significantly enabled the parameters

1 required for HUVEC lumen integrity to be maintained (Fig. 6c-g); this mimicked the behavior in the  
2 xenovascular model containing HUVECs and PDPN-expressing SSC progenies (Fig. 5e-i). To profile  
3 the soluble factors regulating HUVEC lumen integrity, we performed a protein array analysis of 53  
4 angiogenesis-related factors. The results revealed that SSC-progeny CM contained various  
5 angiogenic factors, and the spot intensities of 7 angiogenic factors, i.e., IGFBP-2<sup>33</sup>, osteopontin<sup>34</sup>,  
6 CCL2<sup>35</sup>, MMP-3<sup>36,37</sup>, CXCL12<sup>38</sup>, PAI-1<sup>39-41</sup>, and TSP-2<sup>42,43</sup> were particularly increased (Fig. 6h and  
7 Fig. S3). These data indicate that PDPN-expressing SSC progenies autonomously secrete various  
8 angiogenic factors that maintain HUVEC lumens in concert. Thus, we suggest that epiphyseal  
9 PDPN-expressing stromal cells positively regulate the integrity of the primitive vasculature, via the  
10 release of angiogenic factors.

11

12 **PDPN-expressing SSC progenies secrete components of the basement membrane matrices in**  
13 **response to Notch-mediated interactions with HUVECs**

14 Vascular integrity is not only maintained by endothelial cell survival, but also by the  
15 microenvironments in the perivascular space. ECM is the one of major environmental factors  
16 secreted by endothelial cells and their pericytes that maintains vascular homeostasis<sup>44,45</sup>. We  
17 therefore investigated whether *in vitro* PDPN-expressing SSC progenies secrete collagenous and  
18 non-collagenous ECM components. First, we determined the expression of type IV collagen and  
19 laminin isoforms in *in vitro* PDPN-expressing SSC progenies under monoculture conditions (Fig. 7a

1 and b). The *in vitro* PDPN-expressing SSC progenies endogenously produce type IV collagen and  
2 laminin; however, the extracellular deposition of these ECMs was not observed. Second, we  
3 analyzed the extracellular deposition of basement membrane ECMs in the xenovascular model (Fig.  
4 7c-f). The extensive deposition of type IV collagen and laminin isoforms was observed in close  
5 proximity to the luminal cords (Fig. 7c and e). Quantitative image analysis showed that the levels of  
6 the deposited type IV collagen and laminin isoforms were significantly increased during the co-  
7 culture of HUVECs with *in vitro* PDPN-expressing SSC progenies, compared to the levels observed  
8 in HUVEC monoculture (Fig. 7d and f). These findings indicate that interactions with HUVECs  
9 induce *in vitro* PDPN-expressing SSC progenies to secrete ECMs in the periluminal space.

10           Next, we examined whether the cell-cell interactions with HUVECs altered the ECM  
11 transcript pattern of PDPN-expressing SSC progenies. Xenovascular capillaries were enzymatically  
12 dissociated, and co-cultured PDPN-expressing SSC progenies were isolated *in vitro* via cell sorting  
13 (Fig. 8a). After immunostaining with anti-mouse PDPN-APC and anti-human CD31-FITC  
14 antibodies, PDPN-expressing SSC progenies were identified to be mouse PDPN-positive/human  
15 CD31-negative cells (Fig. 8b). RT-qPCR revealed that the transcript expression level of mouse  
16 vascular basement membrane ECM-related genes, i.e., type IV collagen alpha-chains (*Col4a1* and  
17 *Col4a2*) in PDPN-expressing SSC progenies was significantly upregulated upon co-culture with  
18 HUVECs (Fig. 8c). We evaluated the expression of genes related to non-collagenous basement  
19 membrane ECMs, such as laminin alpha-chains (*lama4* and *lama5*) and nidogen isoforms (*Nid1* and

1 *Nid2*) (Fig. 8d). Among these non-collagenous ECM-related genes, the expression of *lama5* and *Nid1*  
2 was significantly upregulated in PDPN-expressing SSC progenies upon co-culture with HUVECs,  
3 whereas the expression of *Lama4* was not altered and that of *Nid2* was significantly decreased.  
4 However, the expression of genes encoding non-basement membrane fibrillar collagen, i.e., *Colla1*  
5 and *Col3a1*, was downregulated in PDPN-expressing SSC progenies and remained unaltered after  
6 co-culture with HUVECs (Fig. 8e). These findings show that the interaction of PDPN-expressing  
7 SSC progenies with HUVECs results in the switching of the ECM-phenotype of PDPN-expressing  
8 SSC progenies to the basement-membrane–dominant state.

9 Notch activation reportedly upregulated the expression of basement membrane ECM-related  
10 genes in BM-SSCs *in vivo*<sup>46</sup>. Therefore, we investigated whether Notch signals were responsible for  
11 alterations in the ECM phenotype of PDPN-expressing SSC progenies *in vitro*. After treating SSC  
12 progenies with LY-411575, a Notch pathway inhibitor in the background of co-culture with  
13 HUVECs, ECM expression levels were evaluated (Fig. 8f). We first determined the effects of LY-  
14 411575 on the formation of vascular-like lumens in the xenovascular model (Fig. S4). LY-411575 did  
15 not affect the morphology and vascular integrity of the xenovascular model. Next, we investigated  
16 whether LY-411575 altered the expression of ECM-related genes in SSC progenies co-cultured with  
17 HUVECs (Fig. 8c and d). Notch pathway inhibition significantly suppressed the HUVEC-induced  
18 upregulation of *Col4a1*, *Col4a2*, *Lama5*, and *Nid1* (Fig. 8g). LY-411575 did not affect *Nid2*  
19 expression in the background of HUVEC co-culture. These data reveal that Notch-mediated

- 1 interactions of PDPN-expressing SSC progenies with HUVECs result in the switching of the ECM
- 2 phenotype of SSC progenies to the basement membrane-dominant state.
- 3

## 1 **Discussion**

2           Bone marrow PDPN-expressing stromal cells generate megakaryopoietic and erythropoietic  
3 microenvironments in the perivascular space of the bone marrow in adult mice<sup>28, 29</sup>. However, their  
4 contribution to marrow development and homeostasis has been unclear. In this study, we found that  
5 PDPN-positive periosteal cells infiltrated the cartilaginous anlage of the postnatal epiphysis and  
6 acted as pericytes in the primitive SOC vasculature (Fig. S5a). In addition, we revealed that PDPN-  
7 expressing stromal cells originate from SSCs. Based on the findings obtained using the *in vitro*  
8 xenovascular model, we propose that PDPN-expressing stromal cells maintain vascular integrity via  
9 the release of angiogenic factors and vascular basement membrane ECM related molecules (Fig.  
10 S5b). In addition, Notch-mediated interactions of PDPN-expressing stromal cells with endothelial  
11 cells induce the switching of the phenotype associated with the ECM expression pattern to the  
12 pericyte phenotype.

13           PDPN is a mucin-type transmembrane protein that binds to C-type lectin-like receptor-2  
14 (CLEC-2, also known as CLEC1B) expressed on platelets and megakaryocytes<sup>47-49</sup>. In non-bone  
15 marrow tissues, PDPN is expressed by multiple cell types<sup>50</sup>, such as type I alveolar epithelial cells  
16 (ACE1)<sup>51</sup> and lymphatic endothelial cells (LECs)<sup>52</sup>. The interaction between PDPN on ACE1 and  
17 CLEC-2 on platelets regulates neonatal lung development<sup>53</sup>. The interaction of PDPN on LECs and  
18 CLEC-2 on platelets promotes lymphatic vessel development in the embryos<sup>54, 55</sup>. In the lymph node,  
19 fibroblastic reticular cells (FRCs) express PDPN and maintain lymph node homeostasis by regulating

1 the integrity of high endothelial venules (HEVs)<sup>56,57</sup>. During lymph node hemorrhage (e.g.,  
2 increased lymphocyte trafficking such as chronic inflammation), FRC PDPN interacts with CLEC-2  
3 on extravasated platelets. The platelets activated via the PDPN/CLEC-2 axis locally release  
4 sphingosine-1-phosphate in the perivenular space, resulting in increased HEV integrity<sup>56</sup>. The  
5 PDPN/CLEC-2 axis is a key determinant of vascular integrity that maintains vascularized tissue  
6 homeostasis and development. Bone marrow PDPN-expressing stromal cells are considered to  
7 contribute to nascent marrow homeostasis by consolidating vascular integrity in the same manner as  
8 the PDPN/CLEC-2 axis in the lymph node.

9       ECM molecules play an important role in the formation of the vasculature and maintenance  
10 of its integrity. In the vascular system, the ECM forms two types of structures, i.e., the interstitial  
11 matrix and the basement membrane<sup>44</sup>. The basement membrane is a sheet-like structure composed of  
12 type IV collagen, laminins (laminin-411 and laminin-511), nidogens, and perlecan, which represents  
13 a physiological barrier to the movement of intra/extravascular soluble molecules and migrating  
14 cells<sup>45,58</sup>. In addition, the basement membrane provides a scaffold that supports vascular lumen  
15 formation and the interaction between the endothelium and pericytes<sup>59</sup>. The use of *in vitro* PDPN-  
16 expressing SSC progenies in our xenovascular model suggests that PDPN-expressing stromal cells  
17 prime the perivascular environment via the secretion of basement membrane ECM molecules (Fig. 7  
18 c-f). Further, we observed that PDPN-expressing SSC progenies switched their ECM expression  
19 pattern, which resulted in the dominance of basement membrane components, via Notch-mediated



1 interactions with endothelial cells (Fig. 8c-g). Endothelial cells express Notch ligands, such as delta-  
2 like 4 and jagged-1, which activate the Notch pathway in pericytes or perivascular cells via cell-cell  
3 interactions<sup>60-64</sup>. Knockout of Notch pathway intermediaries results in vascular defects or pericyte  
4 dysfunction<sup>65-69</sup>. This evidence indicates the important role played by Notch signaling in vascular  
5 development. We hypothesize that bone marrow PDPN-expressing stromal cells switch their cellular  
6 phenotype to the pericyte phenotype via Notch-mediated interactions with the endothelium, and this  
7 process promotes marrow vascularization.

8           In this study, we have shown the vascular regulatory functions of epiphyseal marrow PDPN-  
9 expressing stromal cells using the *in vitro* xenovascular model. However, this study has a few  
10 limitations. To further demonstrate their role in bone marrow physiology including disease  
11 pathophysiology, an *in vivo* cell-fate reporter or depletion model that specifically targets the marrow  
12 PDPN-expressing stromal cells must be established. These *in vivo* models would demonstrate the  
13 detailed mechanism by which PDPN-expressing stromal cells regulate bone marrow development  
14 and homeostasis. Furthermore, it must be examined whether the marrow PDPN-expressing stromal  
15 cells are involved in bone marrow development during embryogenesis (especially POC-associated  
16 marrow development). These questions need to be addressed in future studies.

17           Our study offers a new perspective in understating how stromal cells regulate nascent bone  
18 marrow development and homeostasis. This study can be used as a basis for further studies to  
19 comprehensively examine the contribution of stromal cells to bone marrow developmental

1 physiology. This would provide insights into the mechanism of the bone and bone marrow

2 development

3

## 1 **Online Methods**

2

### 3 **Mice**

4 C57BL/6NcrSlc mice were purchased from CLEA Japan, Inc (Tokyo, Japan). They were  
5 bred and maintained under standard conditions [a 12 hour light/dark cycle with stable temperature  
6 (25 °C) and humidity (60%)]; the mice that were 7–21 postnatal days old were selected for the  
7 experiments. This study was approved by the animal care and use committee at the Nagoya  
8 University Faculty of Medicine, Nagoya, Japan (D210596-003).

9

### 10 **Flow cytometry**

11 Femurs were harvested from mice at P21. To obtain epiphyseal marrow stromal cells,  
12 dissected epiphyses were gently smashed using a mortar and further cut to small pieces. After a few  
13 washes with ice-cold PBS containing 10% FBS (Sigma-Aldrich, Tokyo, Japan), the epiphyseal  
14 pieces were digested with 0.2% (w/v) collagenase (Wako, Tokyo, Japan) for 2 h at 37 °C and agitated  
15 at 100 rpm. After collagenase digestion, the epiphyseal pieces were further crushed in a mortar with  
16 ice-cold PBS containing 10% FBS. Harvested cells were passed through a 40-micrometer cell  
17 strainer (Corning, Bedford, MA, USA). The cell suspension was centrifuged at  $280 \times g$  for 5 min, at  
18 4 °C. The cell pellet was hemolyzed with sterilized ultrapure water for 6 s, and washed with ice-cold  
19 PBS containing 10% FBS.

1           To obtain diaphyseal marrow stromal cells, the marrow was flushed from the dissected  
2 diaphysis using a 21-gauge needle (Terumo, Tokyo, Japan). The flushed diaphyseal marrow was  
3 suspended in ice-cold PBS containing 10% FBS and passed through a 40-micrometer cell strainer.  
4 After centrifugation, the cell pellet was resuspended and hemolyzed using the ACK buffer (155 mM  
5 NH<sub>4</sub>Cl, 10mM KHCO<sub>3</sub>, 0.1mM EDTA). The hemolyzed cells were probed with antibodies against  
6 hematopoietic lineage markers (CD4, CD8, B220, TER-119, Ly-6G, CD11b, F4/80, and CD71).  
7 Cells of the hematopoietic lineage were depleted using sheep anti-rat immunoglobulin G (IgG)  
8 polyclonal antibody (pAb)-conjugated magnetic beads (Dynabeads, Thermo Fisher Scientific,  
9 Waltham, MA, USA). Cells that were not of hematopoietic lineage were harvested and washed with  
10 ice-cold PBS containing 10% FBS. For enrichment of PDPN-positive cells, epiphyseal or diaphyseal  
11 stromal cells were probed using the anti-PDPN APC conjugate (Clone: 8.1.1, Biolegend, San Diego,  
12 CA, USA) and isolated as APC-positive fraction using anti-APC Microbeads (Miltenyi Biotec, San  
13 Jose, CA, USA) on an LS column (Miltenyi Biotec). The depletion antibodies used in the study are  
14 listed in Table S1.

15           Harvested cells were probed with fluorescence-conjugated antibodies or their isotype  
16 controls. Flow cytometry was performed using a three-laser Attune NxT (Ex.405/488/637 nm,  
17 Thermo Fisher Scientific). Cell sorting was performed using a four-laser FACS Aria II  
18 (Ex.355/407/488/633 nm, BD Bioscience, San Jose, CA, USA). The fluorescence-conjugated  
19 antibodies used in this study are listed in Table S1.

1  
2  
3  
4  
5  
6  
7  
8  
9  
10  
11  
12  
13  
14  
15  
16  
17  
18  
19

## **Immunohistochemistry**

Femurs were fixed with 4% paraformaldehyde (PFA, Wako, Tokyo, Japan) for 24 h and subsequently decalcified for 16 h using K-CX (FALMA, Tokyo, Japan). After washing with diluted water, bone pieces were incubated in 30% sucrose (Wako, Tokyo, Japan) for cryoprotection. Treated tissues were embedded in Tissue-Tek O.C.T. Compound (Tissue-Tek, Sakura, Japan) at -80°C. Frozen sections were sectioned to generate 10-micrometer-thick sections and blocked with phosphate-buffered saline (PBS) containing 3% bovine serum albumin (Sigma-Aldrich, Tokyo, Japan) and 2% goat serum (Sigma-Aldrich). Sections were probed overnight with primary antibodies against PDPN, VE-cadherin, NG2, and  $\alpha$ SMA—diluted with the blocking reagent—at 4 °C. Then, the sections were probed with secondary antibody conjugates, including anti-Syrian hamster IgG Alexa 488 conjugate (for PDPN, A21110, Thermo Fisher Scientific, 1:1000 diluted) and anti-rabbit IgG Alexa 568 conjugate (for VE-cadherin, PDGFR $\beta$ , and NG2, A11034, Thermo Fisher Scientific, 1:2000 diluted), and anti-mouse IgG Alexa 568 conjugate (for  $\alpha$ SMA, A11004, Thermo Fisher Scientific, 1:2000 diluted) for 1.5 h at 25°C. The sections were mounted with VECTASHIELD Antifade Mounting Medium containing DAPI (Vector Laboratories, Burlingame, CA, USA), and observed under an upright fluorescence microscope (AX80, Olympus, Tokyo, Japan). The primary antibodies used in the study are listed in Table S1.

## 1 **Immunocytochemistry**

2           Cells were seeded onto 15-millimeter Fisherbrand™ Coverglass for Growth™ Cover  
3 Glasses (Thermo Fischer Scientific) and cultured in 12-well culture plates at 37°C, 5% CO<sub>2</sub>.  
4 HUVECs were passaged 4 to 8 times, whereas primary SSCs were passaged <3 times. The cells were  
5 fixed with 4% PFA. To achieve permeabilization, cells were incubated with 0.1% Triton X-100  
6 (Wako, Tokyo, Japan) prepared in PBS for 10 min. After washing with PBS, the cells were blocked  
7 with PBS containing 3% bovine serum albumin and 2% goat serum for 1 h at 25°C. Cells were  
8 probed overnight with primary antibodies against PDPN, VE-cadherin, NG2, αSMA, COL4, and  
9 laminins at 4 °C. Then cells were probed with secondary antibody conjugates, including anti-Syrian  
10 hamster IgG Alexa 488 conjugate (for PDPN, A21110, Thermo Fisher Scientific, 1:1000 diluted) and  
11 anti-rabbit IgG Alexa 568 conjugate (for VE-cadherin, PDGFRβ, NG2, COL4, and laminins,  
12 A11034, Thermo Fisher Scientific, 1:2000 diluted), and anti-mouse IgG Alexa 568 conjugate (for  
13 αSMA, A11004, Thermo Fisher Scientific, 1:2000 diluted) for 1.5 h at 25°C. Cells were mounted  
14 using VECTASHIELD Antifade Mounting Medium containing DAPI (Vector Laboratories,  
15 Burlingame, CA, USA), and observed under an inverted fluorescence microscope (IX73, Olympus,  
16 Tokyo, Japan). Acquired images were quantitatively analyzed using Image J 1.46r  
17 (<http://rsb.info.nih.gov/ij/>).

18

## 19 **Cell culture**

1 HUVECs (TaKaRa Bio, Shiga, Japan) were cultured using Endothelial Cell media 2  
2 (EGM2, TaKaRa Bio) and penicillin/streptomycin/amphotericin B (Wako, Osaka, Japan). Isolated  
3 mouse primary SSCs were cultured using the mouse MesenCult Expansion Kit with L-glutamine  
4 (Wako) and penicillin/streptomycin/amphotericin B (Wako).

5

### 6 **Colony formation assay**

7 Isolated cells were seeded onto a 12-well culture plate (1000 cells/well, Thermo Fisher  
8 Scientific) and cultured using the Complete MesenCult expansion medium (Stem Cell Technologies,  
9 Vancouver, Canada) for 7 days. Cells were stained with Giemsa staining solution (Muto pure  
10 chemicals, Tokyo, Japan).

11

### 12 ***In vitro* mesenchymal tri-lineage differentiation**

13 For osteogenic differentiation, cells were seeded into a 24-well plate ( $4 \times 10^5$  cells/cm<sup>2</sup>) and  
14 cultured using the Complete MesenCult expansion medium. After 24 h, the culture medium was  
15 replaced with the Complete mouse MesenCult Osteogenic Medium (Stem Cell Technologies,  
16 Vancouver, Canada) containing L-glutamine (Wako) and penicillin/streptomycin/amphotericin B  
17 (Wako), and cells were cultured for 12 days. Osteoblastic differentiation was investigated by  
18 evaluating calcium deposition via Von Kossa staining. Briefly, cells were fixed with 4% PFA and  
19 washed with PBS. After rinsing cells with distilled water, the deposited calcium was stained using a

1 Calcium Stain Kit (ScyTek laboratories, Utah, USA); cells were subsequently counterstained with  
2 the Fast Red solution.

3 To achieve adipogenic differentiation, cells were seeded in a 24-well plate ( $1 \times 10^5$   
4 cells/cm<sup>2</sup>) and maintained using the Complete MesenCult expansion medium. After 24 h, the culture  
5 medium was replaced with the Complete mouse MesenCult Adipogenic Differentiation Medium  
6 (Stem Cell Technologies) containing L-glutamine (Wako) and penicillin/streptomycin/amphotericin  
7 B (Wako), and cells were cultured for 12 days. Adipogenic differentiation was evaluated by staining  
8 adipocytes with Oil Red O (Wako). A working solution of Oil Red O was prepared by mixing Oil  
9 Red O stock solution [0.15 g Oil Red O (Wako) in 100% isopropanol (Wako)] and distilled water at a  
10 dilution of 6:4. It was filtered after 20 min. Cells were fixed with 4% PFA, washed with PBS, and  
11 incubated with 60% isopropanol for 1 min. Then, cells were incubated for 20 min with a working  
12 solution of Oil red O at room temperature, rinsed with 60% isopropanol, and washed twice with  
13 PBS.

14 To achieve chondrogenic differentiation, cells were seeded in a 24-well plate ( $4 \times 10^5$   
15 cells/cm<sup>2</sup>) and cultured using the Complete MesenCult expansion medium. After 24 h, the culture  
16 medium was replaced with the Complete mouse MesenCult-ACF Chondrogenic Differentiation  
17 Medium (Stem Cell Technologies) and penicillin/streptomycin/amphotericin B (Wako), and cells  
18 were cultured for 12 days. Chondrogenic differentiation was evaluated by staining chondrocyte-  
19 associated mucopolysaccharides with Alcian Blue. Cells were fixed with 4% PFA, washed with PBS,



1 and treated with 3% acetic acid. Then, cells were incubated with an Alcian Blue (pH of 2.5; Muto  
2 Pure Chemicals, Tokyo, Japan) for 30 min at room temperature and washed with 3% acetic acid.  
3 After rinsing with distilled water, the cells were counterstained with the Fast Red solution for 5 min,  
4 and washed twice with distilled water.

5

## 6 **RNA extraction and reverse transcribed-quantitative polymerase chain reaction (RT-qPCR)**

7 Total RNA was extracted by using the ReliaPrep RNA Cell Miniprep System (Promega,  
8 Fitchburg, WI, USA). First strand cDNA was synthesized using the PrimeScript II 1st strand cDNA  
9 Synthesis Kit (TaKaRa Bio, Shiga, Japan), according to the manufacturer's instructions. Multiplex  
10 qPCR was performed using the TaqMan Gene expression Master Mix (Thermo Fisher Scientific),  
11 PrimeTime qPCR Assay (Integrated DNA Technology, Singapore, Republic of Singapore), and  
12 Thermal Cycler Dice Real Time System (TaKaRa Bio). The cycling conditions were: 95 °C for 10  
13 min and 40 cycles of denaturation at 95 °C for 15 s and annealing/extension at 60 °C for 1 min.  
14 Fluorescence intensity was measured at every annealing/extension step. The qPCR probes used in  
15 this study are listed in Table S2.

16

## 17 **HUVEC capillary formation and xenovascular model**

18 HUVECs ( $0.53 \times 10^5/\text{cm}^2$ ) and/or *in vitro* SSC progenies ( $0.39 \times 10^5/\text{cm}^2$ ) were seeded onto  
19 a cell culture plate or coverglass 8-well chamber (Iwaki, Tokyo, Japan) coated with the Corning®

1 Matrigel® Growth Factor Reduced (GFR) Basement Membrane Matrix (Corning), and cultured with  
2 Complete EGM2 supplemented with 2% Matrigel and 10 ng/mL VEGF-A (Miltenyi Biotech).  
3 HUVEC lumen integrity was analyzed using the Angiogenesis Analyzer for ImageJ tool  
4 (<http://image.bio.methods.free.fr/ImageJ/?Angiogenesis-Analyzer-for-ImageJ&lang=en>). To evaluate  
5 the vascular lumen integrity, we determined several parameters, i.e., the number of junctions, the  
6 number of segments (segments are elements delimited by two junctions), the number of meshes  
7 (meshes are areas enclosed by segments), and the total mesh area.

8 For Notch pathway inhibition, *in vitro* SSC progenies were treated with 1  $\mu$ M LY-411575  
9 (Sigma-Aldrich) for 24 h, and re-seeded into the xenovascular model with HUVECs. To achieve the  
10 dissociation of *in vitro* SSC progenies in the xenovascular model, xenovascular lumens were gently  
11 washed with PBS and digested with 1 mg/mL of collagenase/dispase (Sigma-Aldrich) for 10 min at  
12 37 °C. After enzymatic digestion, cells were resuspended in PBS and gently mixed via the pipetting  
13 action 10 times, followed by centrifugation at  $300 \times g$  for 5 min. Harvested cells were resuspended in  
14 PBS containing 10% FBS, and probed with anti-mouse PDPN-APC conjugate and anti-human  
15 CD31-FITC conjugate. Cell sorting was performed using FACS Aria II (BD Bioscience, San Jose,  
16 CA, USA).

17

## 18 **HUVEC proliferation assay**

19 HUVECs were seeded onto a 96-well plate ( $6.25 \times 10^3/\text{cm}^2$ ) and cultured in complete EGM-

1 2 medium. After pre-culture for 24 h, the culture medium was replaced with the complete EGM-2,  
2 non-conditioned medium, and SSC progeny conditioned medium. Cell proliferation was assessed  
3 using the WST-8 assay based Cell Counting Kit-8 (DOJINDO LABORATORIES, Kumamoto,  
4 Japan).

5

### 6 **HUVEC scratch assay**

7 HUVECs were seeded onto a 24-well plate ( $0.52 \times 10^4/\text{cm}^2$ ) and cultured with the complete  
8 EGM-2 medium until complete confluency was achieved. HUVEC monolayers were starved of  
9 EGM-2 for 3 h and scratched using a sterilized 1 mL micropipette tip. The scratched HUVEC  
10 monolayers were cultured using a non-conditioned medium or SSC progeny conditioned medium for  
11 24 h. At 0 h and 24 h, microscopy-based images were obtained using inverted optical microscopy  
12 (CKX53, Olympus), and the covered area was analyzed using Image J 1.46r.

13

### 14 **Protein array**

15 Angiogenic regulators profiled in the conditioned medium were analyzed using the  
16 Proteome Profiler Mouse Angiogenesis Array Kit (ARY015; R&D Systems, Minneapolis, MN,  
17 USA). We loaded the conditioned medium (1 mL) onto the array membrane, as per the  
18 manufacturer's instructions. We used ECL Prime (GE Healthcare, Little Chalfont, United Kingdom)  
19 as a horseradish peroxidase substrate, and detected chemiluminescence signals using the Light

1 Capture II system (Atto Corporation, Tokyo, Japan). Quantification analysis was performed using  
2 Image J 1.46r.

3

#### 4 **Statistical analysis**

5 Quantitative data are depicted as mean  $\pm$  standard deviation values of the mean (SDM) or  
6 mean  $\pm$  standard error values of the mean (SEM). Representative data from at least 3 independent  
7 experiments are shown for immunohistochemistry (IHC) and ICC images. Two-group comparisons  
8 were made using the unpaired Student's *t*-test. Multi-group comparisons were made using one-way  
9 ANOVA and Tukey' multiple comparison test or two-way ANOVA and Sidak's multiple comparison  
10 test. Statistical analyses were performed using GraphPad Prism 5 (GraphPad Software, San Diego,  
11 CA, USA).

12

13

14

15

## 1 **Acknowledgements**

2           This study was supported by grants-in-aid provided by the Japanese Ministry of Education,  
3 Culture, Sports, Science, and Technology (Grant No. 17H05073: S. T and Grant No. 19K08853: A.  
4 K), the National Center for Geriatrics and Gerontology (NCGG, the Research Funding for Longevity  
5 Sciences, Grant No. 30-11: A. K), the Takeda Science Foundation (S. T), and the SENSHIN Medical  
6 Research Foundation (S. T).

## 8 **Author contributions**

9           S.T. designed and performed the research, analyzed the data, and wrote the manuscript.  
10 M.M., Y.K., W.F., and K.O. performed the experiments. N.S., S.O., A.S., and T. K. analyzed the data.  
11 A.K., A.T., K.S-I., and T.M. contributed to the study design and supervised the study. T. Kojima and  
12 F.H. conceived and supervised the study. All the authors have discussed the results and commented  
13 on the manuscript.

## 15 **Competing interests**

16           F.H. received research funding from Daiichi Sankyo, Chugai Pharmaceutical Co, Ltd.,  
17 Astellas Pharma Inc., and MSD. All the other authors state that they have no competing interests to  
18 declare.

19

1 **Data availability**

2 All data supporting the findings of this study are available from the corresponding authors  
3 upon reasonable request.

4

## 1 **References**

- 2
- 3 1. Hanoun, M. & Frenette, P.S. This niche is a maze; an amazing niche. *Cell Stem Cell* **12**, 391-392 (2013).
- 4 2. Morrison, S.J. & Scadden, D.T. The bone marrow niche for haematopoietic stem cells. *Nature* **505**, 327-  
5 334 (2014).
- 6 3. Kronenberg, H.M. Developmental regulation of the growth plate. *Nature* **423**, 332-336 (2003).
- 7 4. Karsenty, G. & Wagner, E.F. Reaching a genetic and molecular understanding of skeletal development.  
8 *Dev Cell* **2**, 389-406 (2002).
- 9 5. Maes, C. *et al.* Osteoblast precursors, but not mature osteoblasts, move into developing and fractured  
10 bones along with invading blood vessels. *Dev Cell* **19**, 329-344 (2010).
- 11 6. Ambrosi, T.H., Longaker, M.T. & Chan, C.K.F. A Revised Perspective of Skeletal Stem Cell Biology.  
12 *Front Cell Dev Biol* **7**, 189 (2019).
- 13 7. Bianco, P. & Robey, P.G. Skeletal stem cells. *Development* **142**, 1023-1027 (2015).
- 14 8. Tournaire, G. *et al.* Nestin-GFP transgene labels skeletal progenitors in the periosteum. *Bone* **133**,  
15 115259 (2020).
- 16 9. Ortinau, L.C. *et al.* Identification of Functionally Distinct Mx1+alphaSMA+ Periosteal Skeletal Stem  
17 Cells. *Cell Stem Cell* **25**, 784-796 e785 (2019).
- 18 10. Duchamp de Lageneste, O. *et al.* Periosteum contains skeletal stem cells with high bone regenerative  
19 potential controlled by Periostin. *Nat Commun* **9**, 773 (2018).
- 20 11. Deveza, L., Ortinau, L., Lei, K. & Park, D. Comparative analysis of gene expression identifies distinct  
21 molecular signatures of bone marrow- and periosteal-skeletal stem/progenitor cells. *PLoS One* **13**,  
22 e0190909 (2018).
- 23 12. Sugiyama, T., Kohara, H., Noda, M. & Nagasawa, T. Maintenance of the hematopoietic stem cell pool  
24 by CXCL12-CXCR4 chemokine signaling in bone marrow stromal cell niches. *Immunity* **25**, 977-988  
25 (2006).
- 26 13. Omatsu, Y. *et al.* The essential functions of adipo-osteogenic progenitors as the hematopoietic stem and  
27 progenitor cell niche. *Immunity* **33**, 387-399 (2010).
- 28 14. Omatsu, Y., Seike, M., Sugiyama, T., Kume, T. & Nagasawa, T. Foxc1 is a critical regulator of  
29 haematopoietic stem/progenitor cell niche formation. *Nature* **508**, 536-540 (2014).
- 30 15. Ara, T. *et al.* Long-term hematopoietic stem cells require stromal cell-derived factor-1 for colonizing  
31 bone marrow during ontogeny. *Immunity* **19**, 257-267 (2003).
- 32 16. Zhou, B.O., Yue, R., Murphy, M.M., Peyer, J.G. & Morrison, S.J. Leptin-receptor-expressing  
33 mesenchymal stromal cells represent the main source of bone formed by adult bone marrow. *Cell Stem*  
34 *Cell* **15**, 154-168 (2014).
- 35 17. Yue, R., Zhou, B.O., Shimada, I.S., Zhao, Z. & Morrison, S.J. Leptin Receptor Promotes Adipogenesis  
36 and Reduces Osteogenesis by Regulating Mesenchymal Stromal Cells in Adult Bone Marrow. *Cell Stem*  
37 *Cell* **18**, 782-796 (2016).
- 38 18. Ding, L., Saunders, T.L., Enikolopov, G. & Morrison, S.J. Endothelial and perivascular cells maintain

- 1 haematopoietic stem cells. *Nature* **481**, 457-462 (2012).
- 2 19. Park, D. *et al.* Endogenous bone marrow MSCs are dynamic, fate-restricted participants in bone  
3 maintenance and regeneration. *Cell Stem Cell* **10**, 259-272 (2012).
- 4 20. Worthley, D.L. *et al.* Gremlin 1 identifies a skeletal stem cell with bone, cartilage, and reticular stromal  
5 potential. *Cell* **160**, 269-284 (2015).
- 6 21. Mendez-Ferrer, S. *et al.* Mesenchymal and haematopoietic stem cells form a unique bone marrow niche.  
7 *Nature* **466**, 829-834 (2010).
- 8 22. Kunisaki, Y. *et al.* Arteriolar niches maintain haematopoietic stem cell quiescence. *Nature* **502**, 637-643  
9 (2013).
- 10 23. Matsushita, Y. *et al.* A Wnt-mediated transformation of the bone marrow stromal cell identity  
11 orchestrates skeletal regeneration. *Nat Commun* **11**, 332 (2020).
- 12 24. Mizuhashi, K. *et al.* Resting zone of the growth plate houses a unique class of skeletal stem cells. *Nature*  
13 **563**, 254-258 (2018).
- 14 25. Chan, C.K. *et al.* Identification and specification of the mouse skeletal stem cell. *Cell* **160**, 285-298  
15 (2015).
- 16 26. Greenbaum, A. *et al.* CXCL12 in early mesenchymal progenitors is required for haematopoietic stem-  
17 cell maintenance. *Nature* **495**, 227-230 (2013).
- 18 27. Asada, N. *et al.* Differential cytokine contributions of perivascular haematopoietic stem cell niches. *Nat*  
19 *Cell Biol* **19**, 214-223 (2017).
- 20 28. Tamura, S. *et al.* Podoplanin-positive periarteriolar stromal cells promote megakaryocyte growth and  
21 proplatelet formation in mice by CLEC-2. *Blood* **127**, 1701-1710 (2016).
- 22 29. Otake, S. *et al.* CLEC-2 stimulates IGF-1 secretion from podoplanin-positive stromal cells and positively  
23 regulates erythropoiesis in mice. *J Thromb Haemost* (2021).
- 24 30. Baccin, C. *et al.* Combined single-cell and spatial transcriptomics reveal the molecular, cellular and  
25 spatial bone marrow niche organization. *Nat Cell Biol* **22**, 38-48 (2020).
- 26 31. Attwell, D., Mishra, A., Hall, C.N., O'Farrell, F.M. & Dalkara, T. What is a pericyte? *J Cereb Blood Flow*  
27 *Metab* **36**, 451-455 (2016).
- 28 32. Hartmann, D.A. *et al.* Pericyte structure and distribution in the cerebral cortex revealed by high-  
29 resolution imaging of transgenic mice. *Neurophotonics* **2**, 041402 (2015).
- 30 33. Azar, W.J. *et al.* IGFBP-2 enhances VEGF gene promoter activity and consequent promotion of  
31 angiogenesis by neuroblastoma cells. *Endocrinology* **152**, 3332-3342 (2011).
- 32 34. Dai, J. *et al.* Osteopontin induces angiogenesis through activation of PI3K/AKT and ERK1/2 in  
33 endothelial cells. *Oncogene* **28**, 3412-3422 (2009).
- 34 35. Stamatovic, S.M., Keep, R.F., Mostarica-Stojkovic, M. & Andjelkovic, A.V. CCL2 regulates angiogenesis  
35 via activation of Ets-1 transcription factor. *J Immunol* **177**, 2651-2661 (2006).
- 36 36. Quintero-Fabian, S. *et al.* Role of Matrix Metalloproteinases in Angiogenesis and Cancer. *Front Oncol*  
37 **9**, 1370 (2019).
- 38 37. Lee, S., Jilani, S.M., Nikolova, G.V., Carpizo, D. & Iruela-Arispe, M.L. Processing of VEGF-A by matrix



- 1 metalloproteinases regulates bioavailability and vascular patterning in tumors. *J Cell Biol* **169**, 681-691  
2 (2005).
- 3 38. Salcedo, R. & Oppenheim, J.J. Role of chemokines in angiogenesis: CXCL12/SDF-1 and CXCR4  
4 interaction, a key regulator of endothelial cell responses. *Microcirculation* **10**, 359-370 (2003).
- 5 39. Wu, J. *et al.* Plasminogen activator inhibitor-1 inhibits angiogenic signaling by uncoupling vascular  
6 endothelial growth factor receptor-2-alphaVbeta3 integrin cross talk. *Arterioscler Thromb Vasc Biol* **35**,  
7 111-120 (2015).
- 8 40. Isogai, C. *et al.* Plasminogen activator inhibitor-1 promotes angiogenesis by stimulating endothelial cell  
9 migration toward fibronectin. *Cancer Res* **61**, 5587-5594 (2001).
- 10 41. Devy, L. *et al.* The pro- or antiangiogenic effect of plasminogen activator inhibitor 1 is dose dependent.  
11 *FASEB J* **16**, 147-154 (2002).
- 12 42. Oganessian, A., Armstrong, L.C., Migliorini, M.M., Strickland, D.K. & Bornstein, P. Thrombospondins  
13 use the VLDL receptor and a nonapoptotic pathway to inhibit cell division in microvascular endothelial  
14 cells. *Mol Biol Cell* **19**, 563-571 (2008).
- 15 43. Krady, M.M. *et al.* Thrombospondin-2 modulates extracellular matrix remodeling during physiological  
16 angiogenesis. *Am J Pathol* **173**, 879-891 (2008).
- 17 44. Murakami, M. & Simons, M. Regulation of vascular integrity. *J Mol Med (Berl)* **87**, 571-582 (2009).
- 18 45. Davis, G.E. & Senger, D.R. Endothelial extracellular matrix: biosynthesis, remodeling, and functions  
19 during vascular morphogenesis and neovessel stabilization. *Circ Res* **97**, 1093-1107 (2005).
- 20 46. Blache, U. *et al.* Notch-inducing hydrogels reveal a perivascular switch of mesenchymal stem cell fate.  
21 *EMBO Rep* **19** (2018).
- 22 47. Tang, T. *et al.* A mouse knockout library for secreted and transmembrane proteins. *Nat Biotechnol* **28**,  
23 749-755 (2010).
- 24 48. Suzuki-Inoue, K. *et al.* Involvement of the snake toxin receptor CLEC-2, in podoplanin-mediated platelet  
25 activation, by cancer cells. *J Biol Chem* **282**, 25993-26001 (2007).
- 26 49. Suzuki-Inoue, K. *et al.* A novel Syk-dependent mechanism of platelet activation by the C-type lectin  
27 receptor CLEC-2. *Blood* **107**, 542-549 (2006).
- 28 50. Astarita, J.L., Acton, S.E. & Turley, S.J. Podoplanin: emerging functions in development, the immune  
29 system, and cancer. *Front Immunol* **3**, 283 (2012).
- 30 51. Ramirez, M.I. *et al.* T1alpha, a lung type I cell differentiation gene, is required for normal lung cell  
31 proliferation and alveolus formation at birth. *Dev Biol* **256**, 61-72 (2003).
- 32 52. Breiteneder-Geleff, S. *et al.* Angiosarcomas express mixed endothelial phenotypes of blood and  
33 lymphatic capillaries: podoplanin as a specific marker for lymphatic endothelium. *Am J Pathol* **154**, 385-  
34 394 (1999).
- 35 53. Tsukiji, N. *et al.* Platelets play an essential role in murine lung development through Clec-2/podoplanin  
36 interaction. *Blood* **132**, 1167-1179 (2018).
- 37 54. Suzuki-Inoue, K. *et al.* Essential in vivo roles of the C-type lectin receptor CLEC-2: embryonic/neonatal  
38 lethality of CLEC-2-deficient mice by blood/lymphatic misconnections and impaired thrombus

- 1 formation of CLEC-2-deficient platelets. *J Biol Chem* **285**, 24494-24507 (2010).
- 2 55. Bertozzi, C.C. *et al.* Platelets regulate lymphatic vascular development through CLEC-2-SLP-76  
3 signaling. *Blood* **116**, 661-670 (2010).
- 4 56. Herzog, B.H. *et al.* Podoplanin maintains high endothelial venule integrity by interacting with platelet  
5 CLEC-2. *Nature* **502**, 105-109 (2013).
- 6 57. Farr, A.G. *et al.* Characterization and cloning of a novel glycoprotein expressed by stromal cells in T-  
7 dependent areas of peripheral lymphoid tissues. *J Exp Med* **176**, 1477-1482 (1992).
- 8 58. Hallmann, R. *et al.* Expression and function of laminins in the embryonic and mature vasculature. *Physiol*  
9 *Rev* **85**, 979-1000 (2005).
- 10 59. Stratman, A.N., Malotte, K.M., Mahan, R.D., Davis, M.J. & Davis, G.E. Pericyte recruitment during  
11 vasculogenic tube assembly stimulates endothelial basement membrane matrix formation. *Blood* **114**,  
12 5091-5101 (2009).
- 13 60. Schepke, L. *et al.* Notch promotes vascular maturation by inducing integrin-mediated smooth muscle  
14 cell adhesion to the endothelial basement membrane. *Blood* **119**, 2149-2158 (2012).
- 15 61. Poulos, M.G. *et al.* Endothelial Jagged-1 is necessary for homeostatic and regenerative hematopoiesis.  
16 *Cell Rep* **4**, 1022-1034 (2013).
- 17 62. Liu, H., Kennard, S. & Lilly, B. NOTCH3 expression is induced in mural cells through an autoregulatory  
18 loop that requires endothelial-expressed JAGGED1. *Circ Res* **104**, 466-475 (2009).
- 19 63. Jin, S. *et al.* Notch signaling regulates platelet-derived growth factor receptor-beta expression in vascular  
20 smooth muscle cells. *Circ Res* **102**, 1483-1491 (2008).
- 21 64. High, F.A. *et al.* Endothelial expression of the Notch ligand Jagged1 is required for vascular smooth  
22 muscle development. *Proc Natl Acad Sci U S A* **105**, 1955-1959 (2008).
- 23 65. Xue, Y. *et al.* Embryonic lethality and vascular defects in mice lacking the Notch ligand Jagged1. *Hum*  
24 *Mol Genet* **8**, 723-730 (1999).
- 25 66. Limbourg, F.P. *et al.* Essential role of endothelial Notch1 in angiogenesis. *Circulation* **111**, 1826-1832  
26 (2005).
- 27 67. Krebs, L.T. *et al.* Haploinsufficient lethality and formation of arteriovenous malformations in Notch  
28 pathway mutants. *Genes Dev* **18**, 2469-2473 (2004).
- 29 68. Huppert, S.S. *et al.* Embryonic lethality in mice homozygous for a processing-deficient allele of Notch1.  
30 *Nature* **405**, 966-970 (2000).
- 31 69. Gale, N.W. *et al.* Haploinsufficiency of delta-like 4 ligand results in embryonic lethality due to major  
32 defects in arterial and vascular development. *Proc Natl Acad Sci U S A* **101**, 15949-15954 (2004).

33

34

35

1 **Figures**

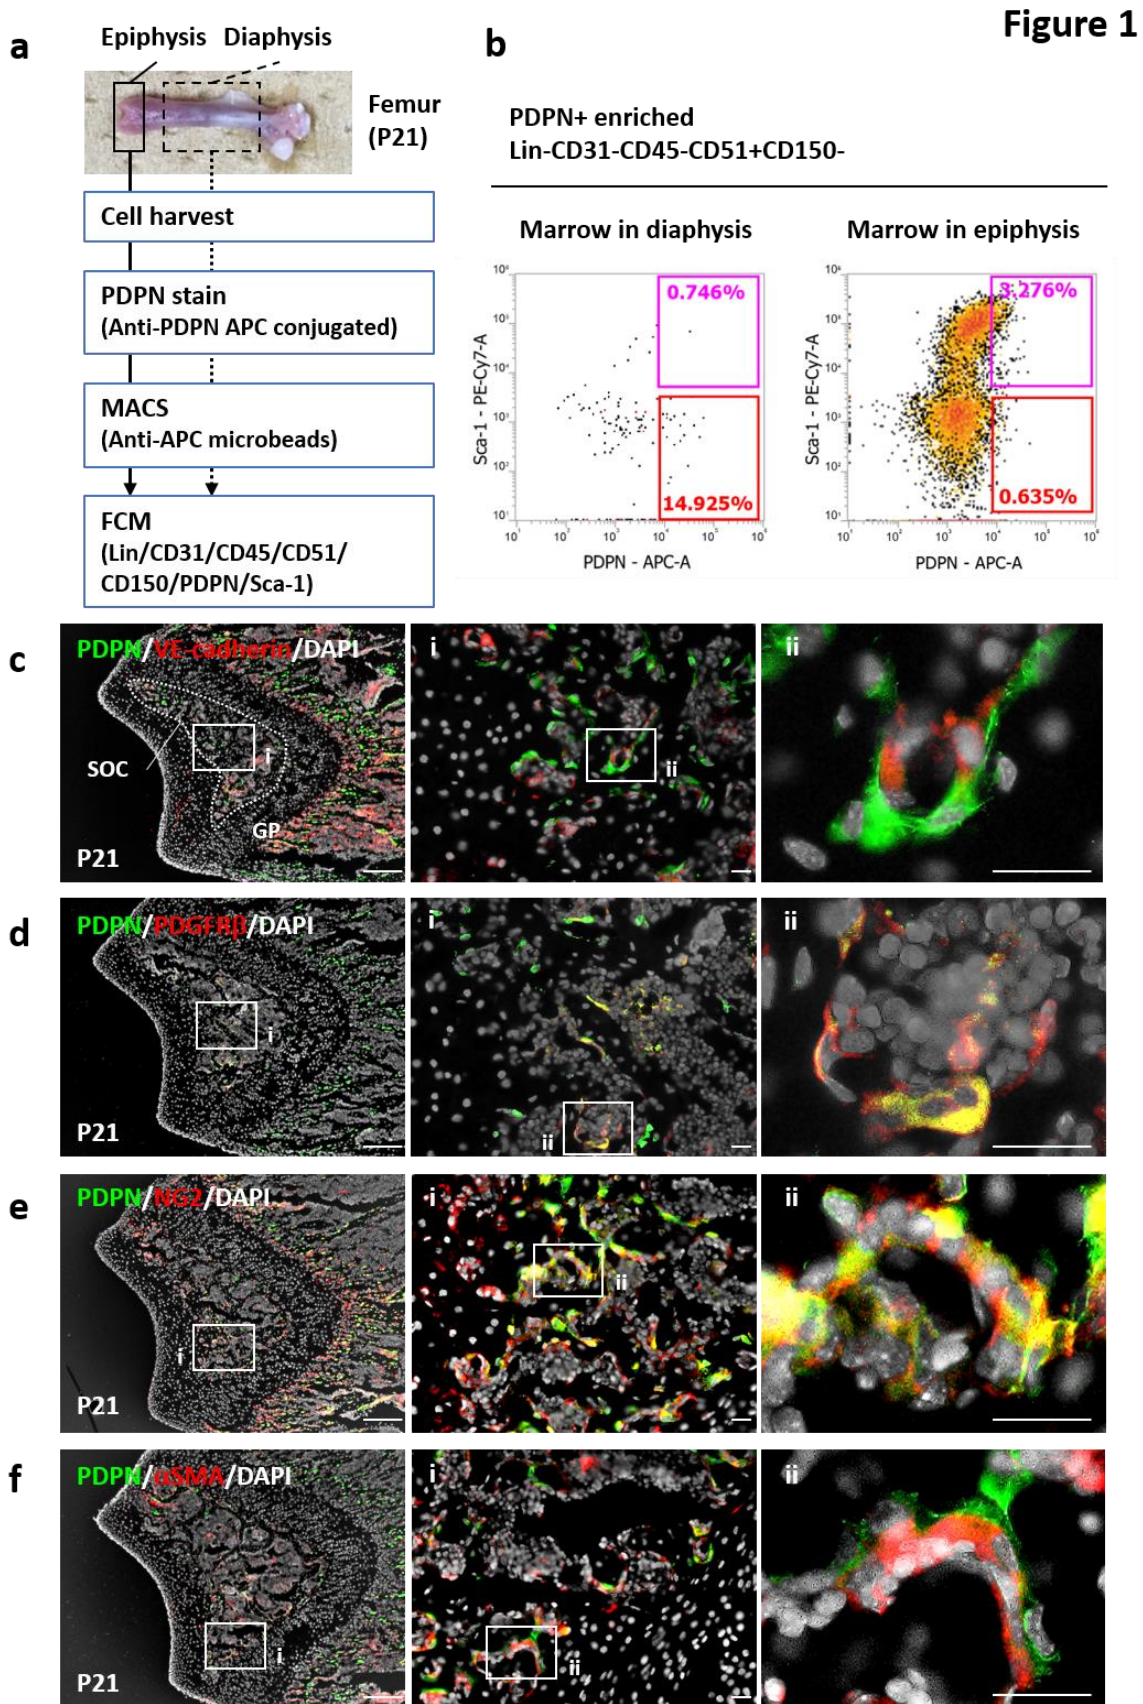

2

1 **Figure. 1**

2 **Epiphyseal PDPN-expressing stromal cells are the pericytes on the primitive capillary-like**  
3 **vascular bed of the secondary ossification center.** (A) Scheme to detect marrow PDPN-expressing  
4 stromal cells via flow cytometry. (B) Representative flow cytometric data of PDPN-expressing  
5 stromal marrow cells in the epiphysis and diaphysis in mice at P21. PDPN-positive enriched marrow  
6 cells were analyzed by flowcytometry. Magenta and red gates indicate the PDPN(+)/Sca-1(+) and  
7 PDPN(+)/Sca-1(-) populations, respectively. The percentages inside each gate indicate the cells  
8 contained in the population of Lin(-)CD31(-)CD45(-)CD51(+)  
9 CD150(-). (C) Representative IHC  
10 images of P21 mouse epiphysis. Epiphysis cryo-sections were stained with PDPN, VE-cadherin, and  
11 DAPI. PDPN-expressing stromal cells surrounded primitive vasculatures. (D-F) Representative IHC  
12 images of P21 mouse epiphysis with PDPN/PDGFR $\beta$ /DAPI (D), PDPN/NG2/DAPI (E), and  
13 PDPN/ $\alpha$ SMA/DAPI (F). Scale bars in the lefts indicate 200  $\mu$ m. Scale bars in the middle and right  
14 panels indicate 50  $\mu$ m. PDPN: podoplanin, P21: postnatal day 21, IHC: immunohistochemistry, VE-  
15 cadherin: vascular endothelial-cadherin, DAPI: 4',6-diamidino-2-phenylindole, PDGFR $\beta$ : platelet-  
16 derived growth factor receptor- $\beta$ , NG2: neuron-glia antigen-2,  $\alpha$ SMA:  $\alpha$ -smooth muscle actin

Figure 2

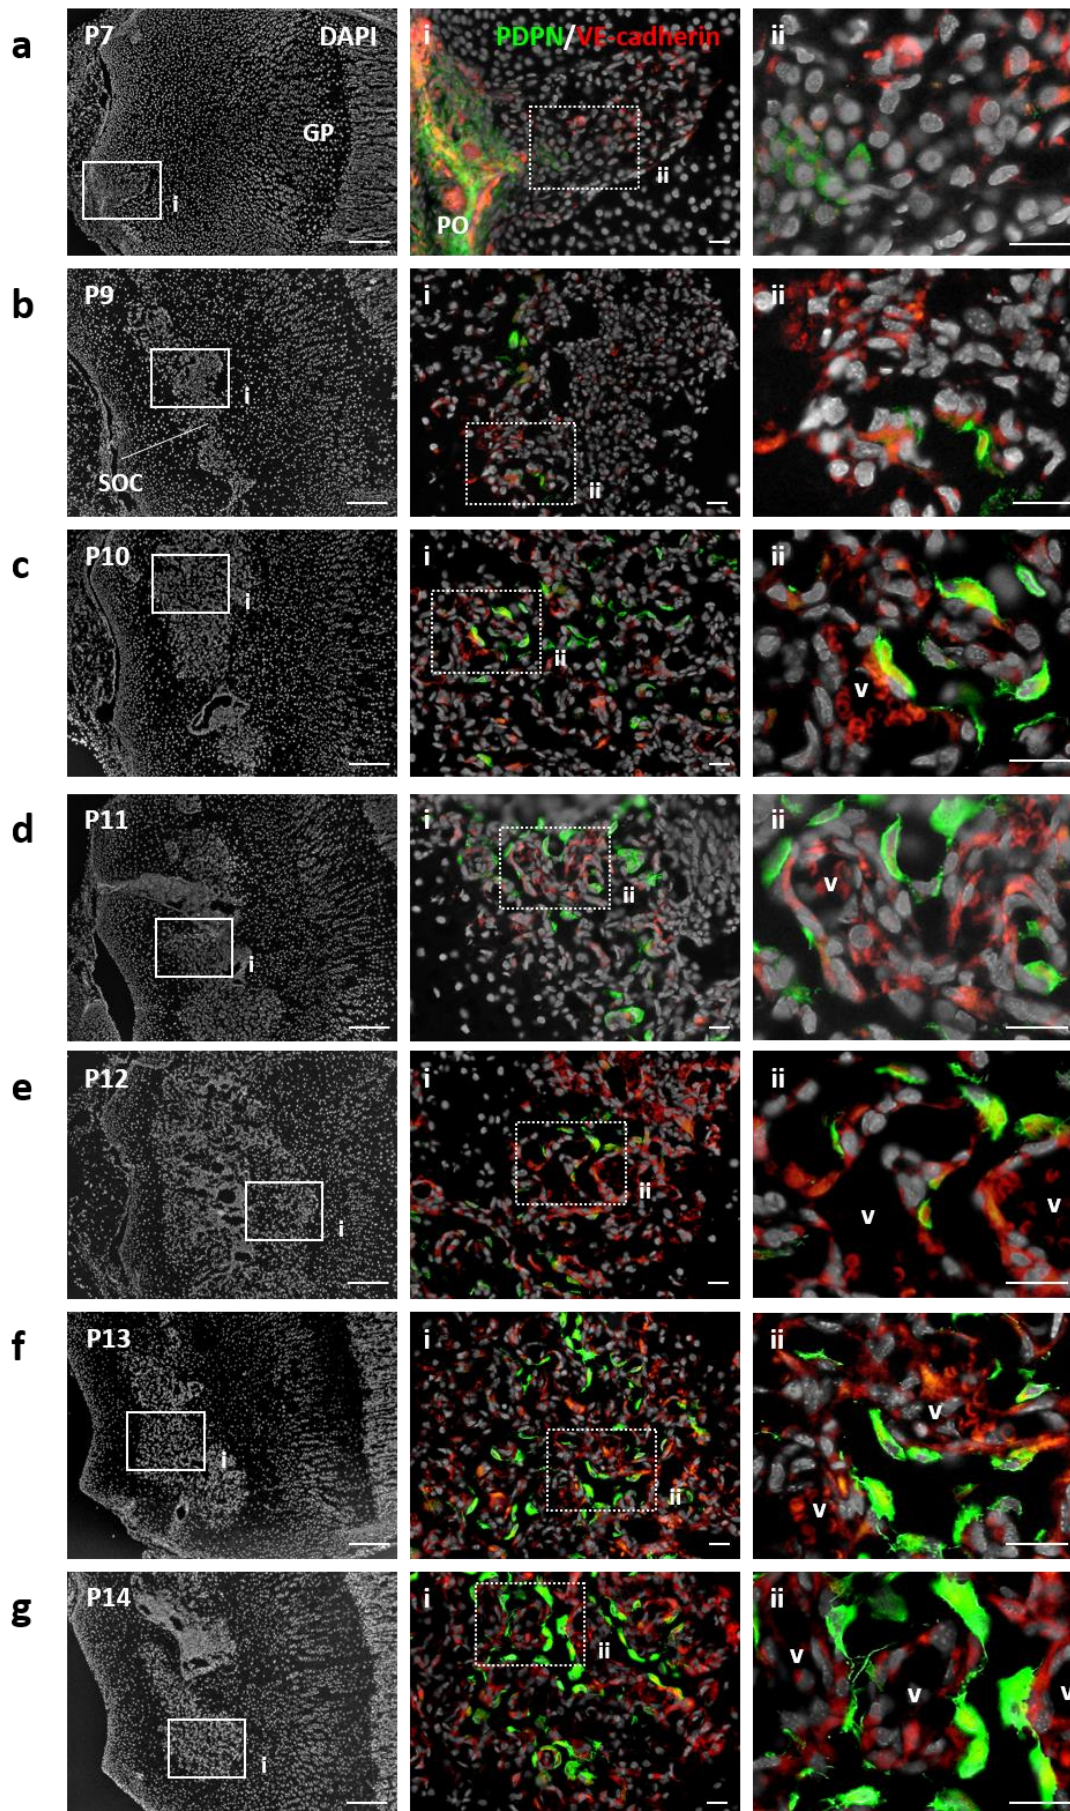

1 **Figure. 2**

2 **Epiphyseal PDPN-expressing stromal cells originate from the periosteal cellular component**

3 **and populate the secondary ossification center as pericytes.** (A-G) Representative IHC images of

4 postnatal mouse epiphysis at P7 (A), P9 (B), P10 (C), P11 (D), P12 (E), P13(F), and P14 (G).

5 Epiphysis cryo-sections were stained with PDPN, VE-cadherin, and DAPI. Scale bars in the lefts

6 indicate 200  $\mu\text{m}$ . Scale bars in the middle and right panels indicate 50  $\mu\text{m}$ . PDPN: podoplanin, VE-

7 cadherin: vascular endothelial-cadherin, and DAPI: 4',6-diamidino-2-phenylindole, P7, P9, P10, P11,

8 P12, P13, P14: postnatal day 7, 9, 10, 11, 12, 13, 14

9

**Figure 3**

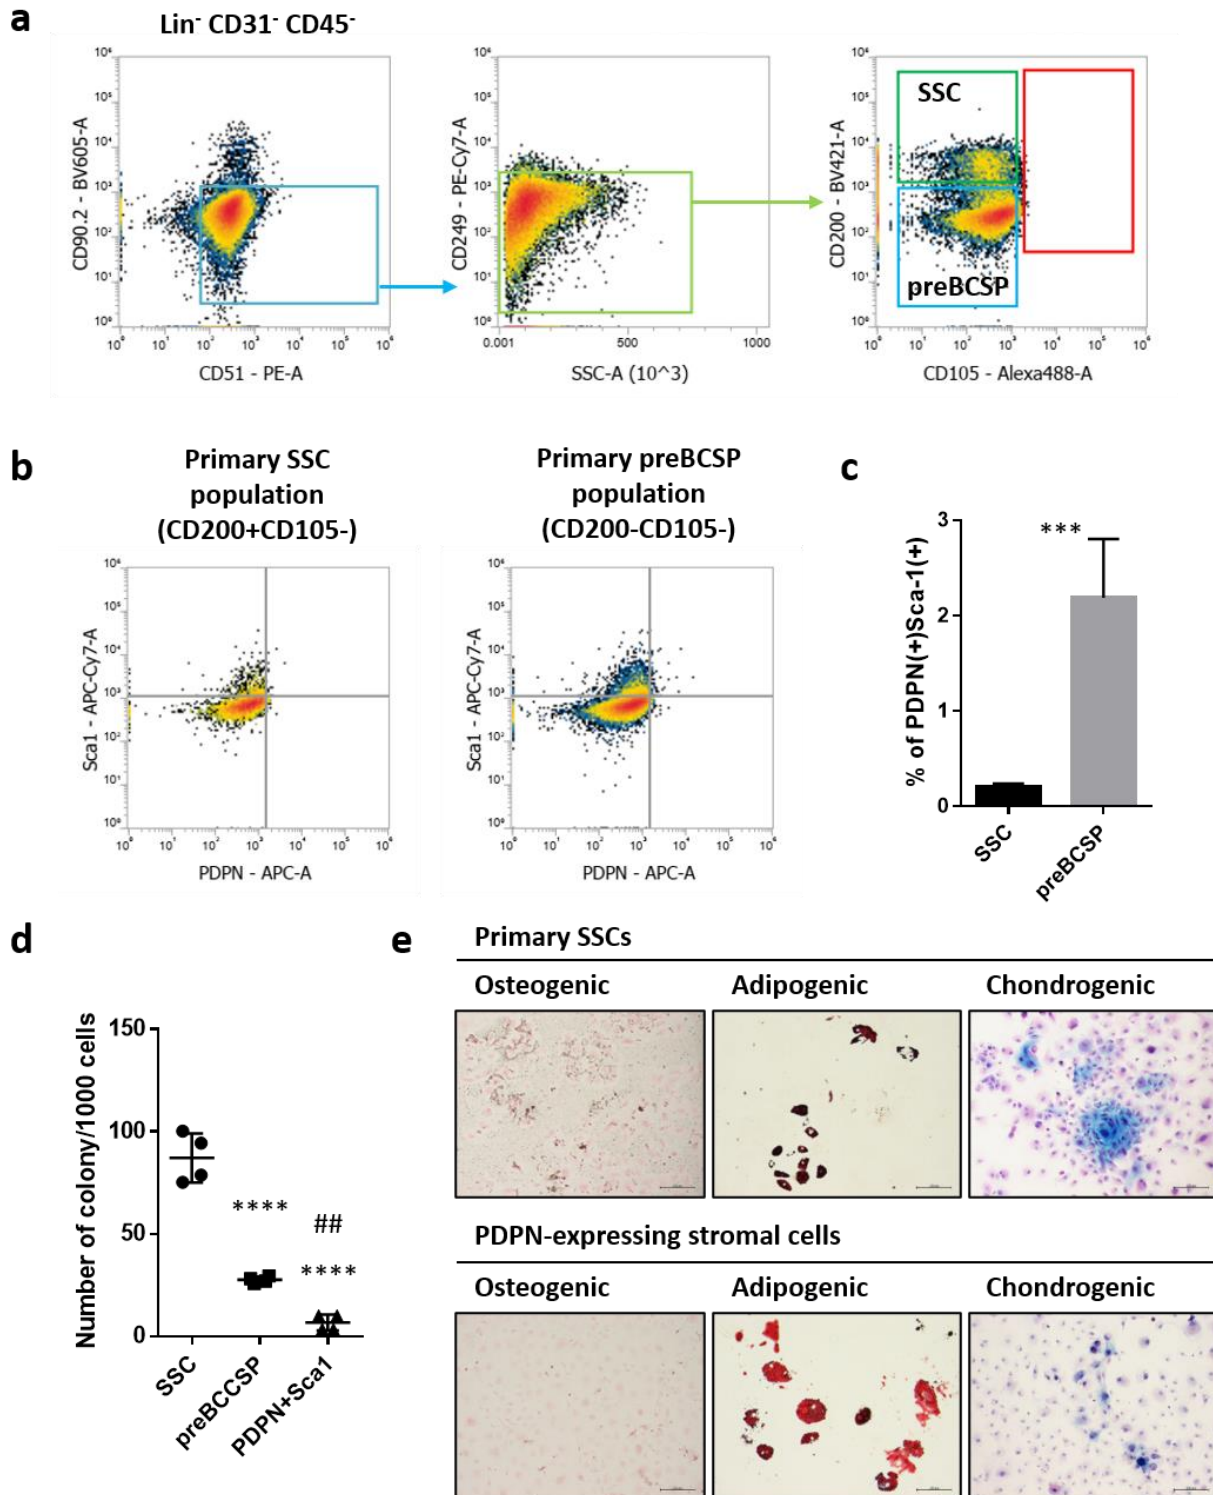

1  
2  
3  
4  
5

1 **Figure. 3**

2 **Epiphyseal PDPN-expressing stromal cells partially exhibit the SSC lineage phenotype. (A)**

3 Flow cytometric gating strategy for the mouse epiphyseal skeletal stem cell lineage. Cells that were  
4 Lin(-)CD31(-)CD45(-)CD51(+)-CD90(-)CD249(-)CD200(+)-CD105(-) were identified as SSCs. Cells  
5 that were Lin(-)CD31(-)CD45(-)CD51(+)-CD90(-)CD249(-)CD200(-)CD105(-) were identified as  
6 SSC-lineage progenitor and preBCSP populations. (B) Representative flowcytometric scattergrams  
7 detecting the PDPN-expressing stromal cells in the epiphyseal primary SSC and preBCSP  
8 populations. (C) Quantitative data of the PDPN-expressing stromal cells in the epiphyseal primary  
9 SSC and preBCSP populations. \*\*\* $p < 0.001$ , as detected by the Student's *t*-test ( $n = 4$  per group);  
10 error bars represent SDMs. (D) Colony formation assay analyzing the clonogenicity of epiphyseal  
11 PDPN-expressing stromal cells. Primary SSCs, preBCSPs, and PDPN-expressing stromal cells in the  
12 epiphysis were isolated using the cell sorter, and 1000 cells/well were seeded into a 24-well plate.  
13 Colonies were counted via Giemsa staining. \*\*\*\* $p < 0.0001$  v.s. SSCs. ## $p < 0.01$  v.s. preBCSPs.  
14 Statistical analysis was performed using one-way ANOVA with Tukey's multiple comparison test ( $n$   
15 = 4 per group). The error bars represent SDMs. (E) Osteo/adipo/chondrogenic differentiation ability  
16 of epiphyseal PDPN-expressing stromal cells. The differentiation of osteogenic, adipogenic, and  
17 chondrogenic lineages was evaluated via Von Kossa staining (black), Oil-red staining (red), and  
18 Alcian blue staining (sky-blue), respectively. Scale bars indicate 200  $\mu\text{m}$ . SSC: skeletal stem cell,  
19 preBCSP: pre-bone cartilage stroma progenitor, PDPN: podoplanin, ANOVA: analysis of variance,  
20 SDMs: mean  $\pm$  standard deviation values of the mean

21



**Figure 4**

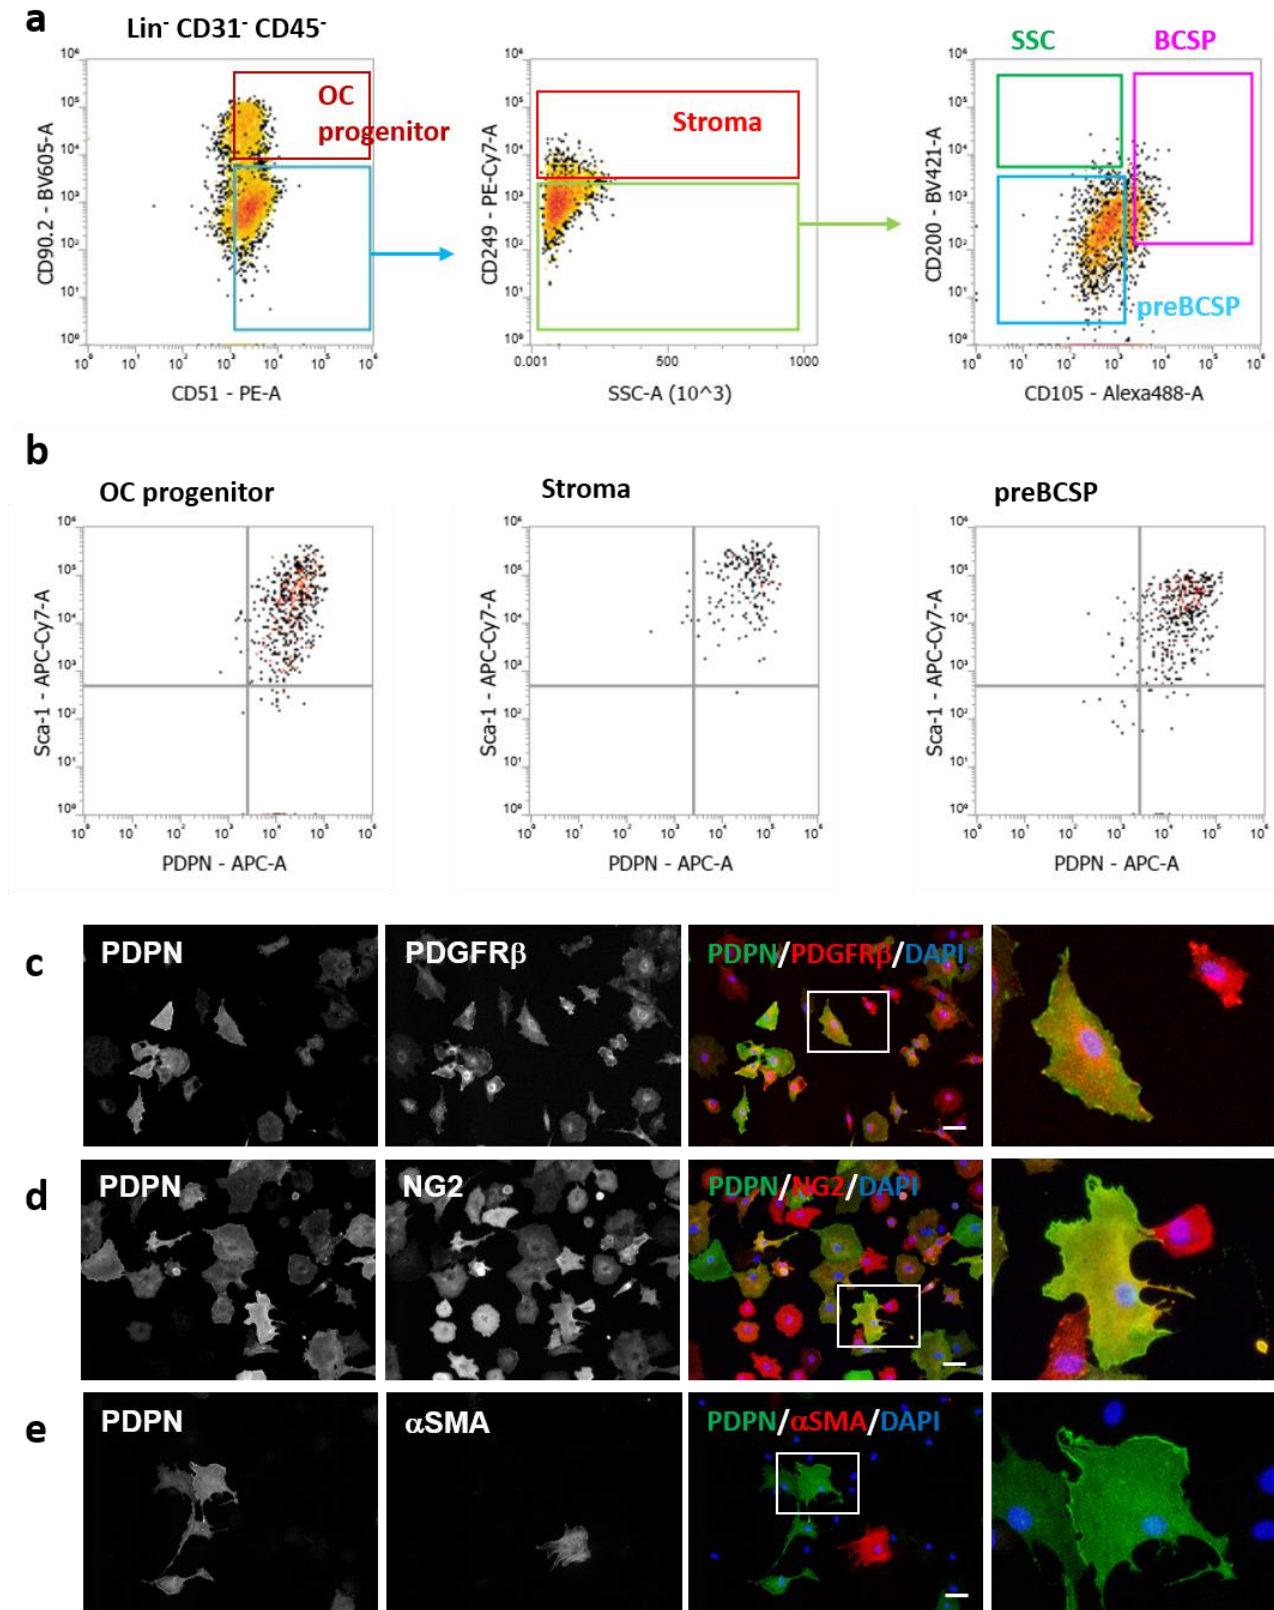

1  
2

1 **Figure. 4**

2 **SSCs generate PDPN-expressing progenies with a phenotype identical to that of epiphyseal**

3 **PDPN-expressing stromal cells.** (A) Representative flowcytometric data of *in vitro* SSC progenies

4 generated from primary isolated SSCs during culture with MesenCult. (B) PDPN and Sca-1

5 expression in *in vitro* generated SSC progenies. (C-E) Representative ICC images of the *in vitro*

6 PDPN-expressing SSC progenies stained with PDPN/PDGFR $\beta$ /DAPI (C), PDPN/NG2/DAPI (D),

7 and PDPN/ $\alpha$ SMA/DAPI (E). Scale bars in middle panels indicate 50  $\mu$ m. PDPN: podoplanin, Sca-1:

8 stem cell antigen-1, ICC: immunocytochemistry, DAPI: 4',6-diamidino-2-phenylindole, PDGFR $\beta$ :

9 platelet-derived growth factor receptor- $\beta$ , NG2: neuron-gial antigen-2,  $\alpha$ SMA:  $\alpha$ -smooth muscle

10 actin

11

12

**Figure 5**

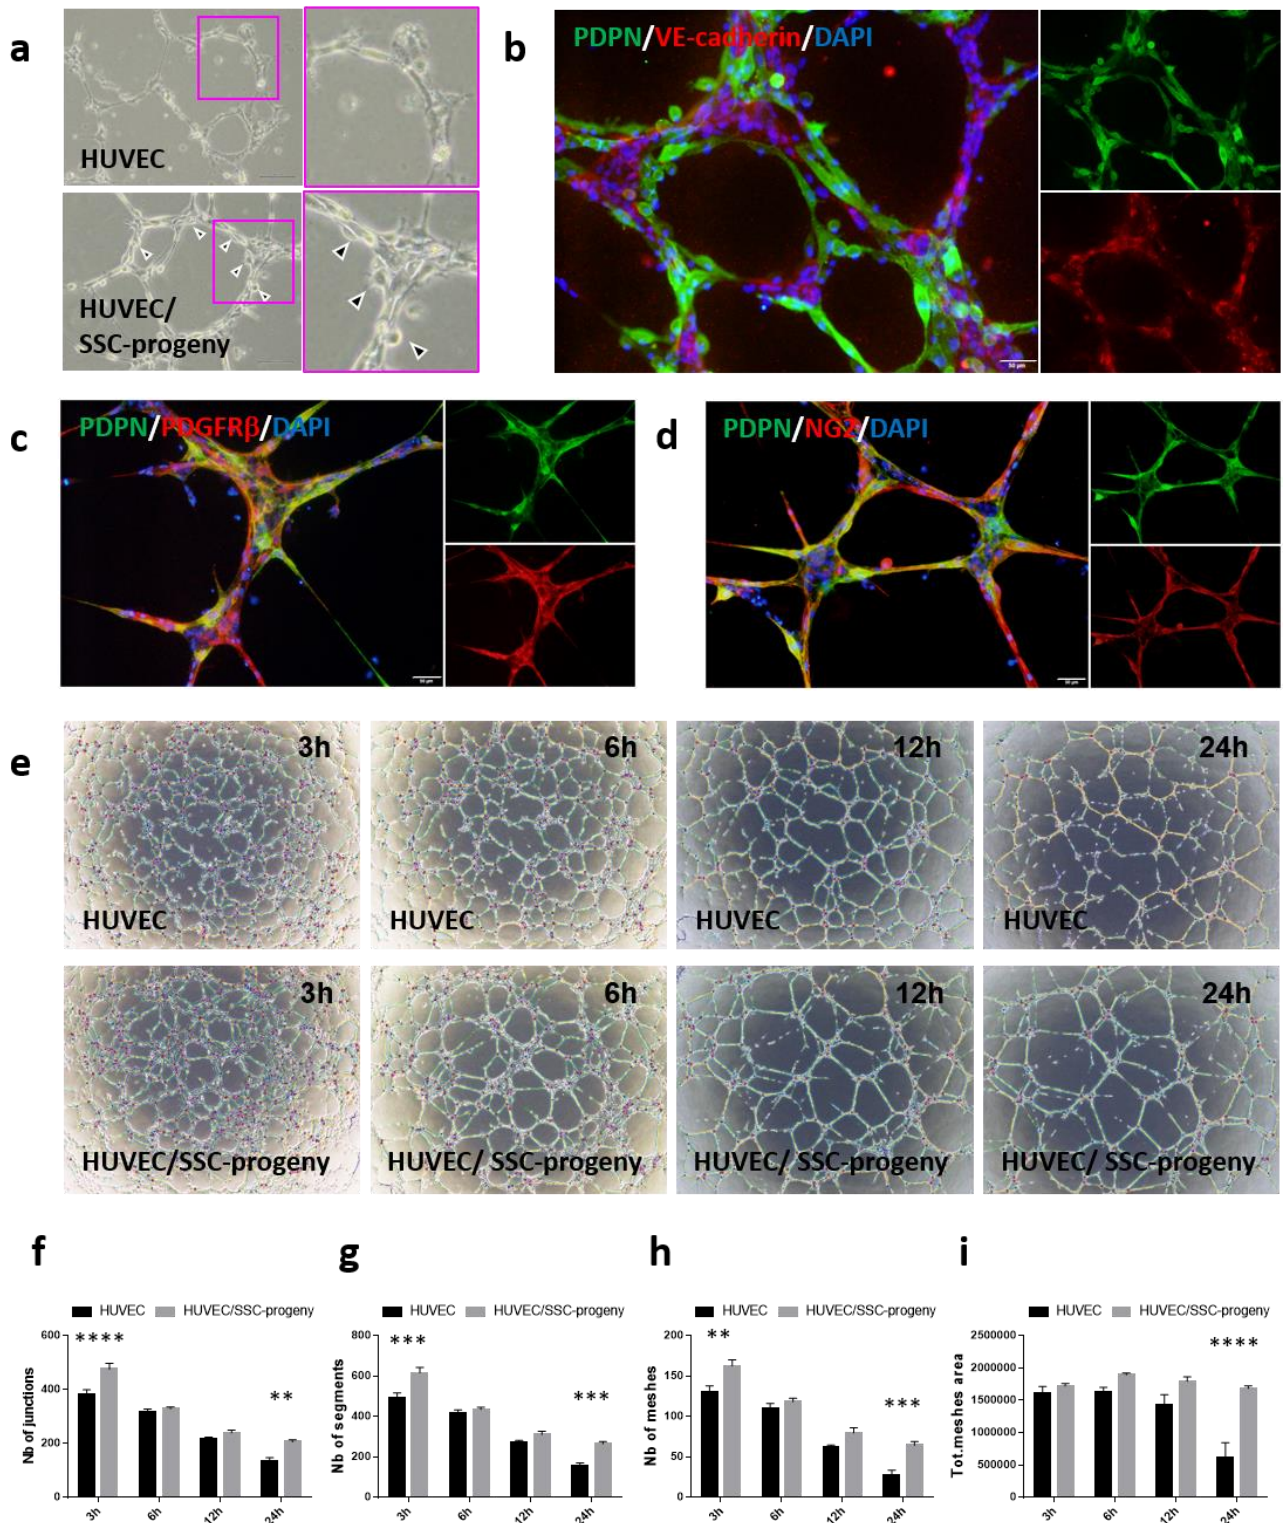

1  
2  
3  
4  
5

1 **Figure. 5**

2 ***In vitro* PDPN-expressing SSC progenies consolidate HUVEC capillary-like lumens in a**  
3 **xenovascular model.** (A) Representative optical microscope images of the vascular-like lumen of  
4 HUVECs (upper panel) and the xenovascular model co-cultured with HUVECs and PDPN-  
5 expressing SSC progenies *in vitro* (lower panel). Arrow heads indicate non-endothelial cells with  
6 fibroblastic morphologies attached onto HUVEC cords. (B) Representative ICC images of the  
7 xenovascular model stained with PDPN, VE-cadherin, and DAPI. Scale bar indicates 50  $\mu$ m. (C and  
8 D) Representative ICC images of the xenovascular images stained with PDPN/PDGFR $\beta$ /DAPI (C)  
9 and PDPN/NG2/DAPI (D). Scale bars indicate 50  $\mu$ m. (E) Time series images of HUVEC vascular-  
10 like lumens (upper panels) and the xenovascular models co-cultured with HUVECs and PDPN-  
11 expressing SSC progenies *in vitro* (lower panels). The time displayed on each image indicates the  
12 time point at the start of the culture process. (F-I) Quantitative analysis of vascular lumen integrity in  
13 the xenovascular model. The parameters used to evaluate lumen vascularization, including the  
14 number of junctions (F), the number of segments (G), the number of meshes (H), and the total mesh  
15 area (I), were measured using the angiogenesis analyzer tool. \*\*p < 0.01. \*\*\*p < 0.001. \*\*\*\*p <  
16 0.0001. Statistical analysis was performed via two-way ANOVA and Sidak's multiple comparison  
17 test (n = 5 per group). The error bars represent SEMs. HUVEC: human umbilical vein endothelial  
18 cell, PDPN: podoplanin, SSC: skeletal stem cell, ICC: immunocytochemistry, VE-cadherin: vascular  
19 endothelial-cadherin, DAPI: 4',6-diamidino-2-phenylindole, PDGFR $\beta$ : platelet-derived growth factor  
20 receptor- $\beta$ , NG2: neuron-glia antigen-2, ANOVA: analysis of variance, SEMs: mean  $\pm$  standard  
21 error values of the mean

22

23

24

**Figure 6**

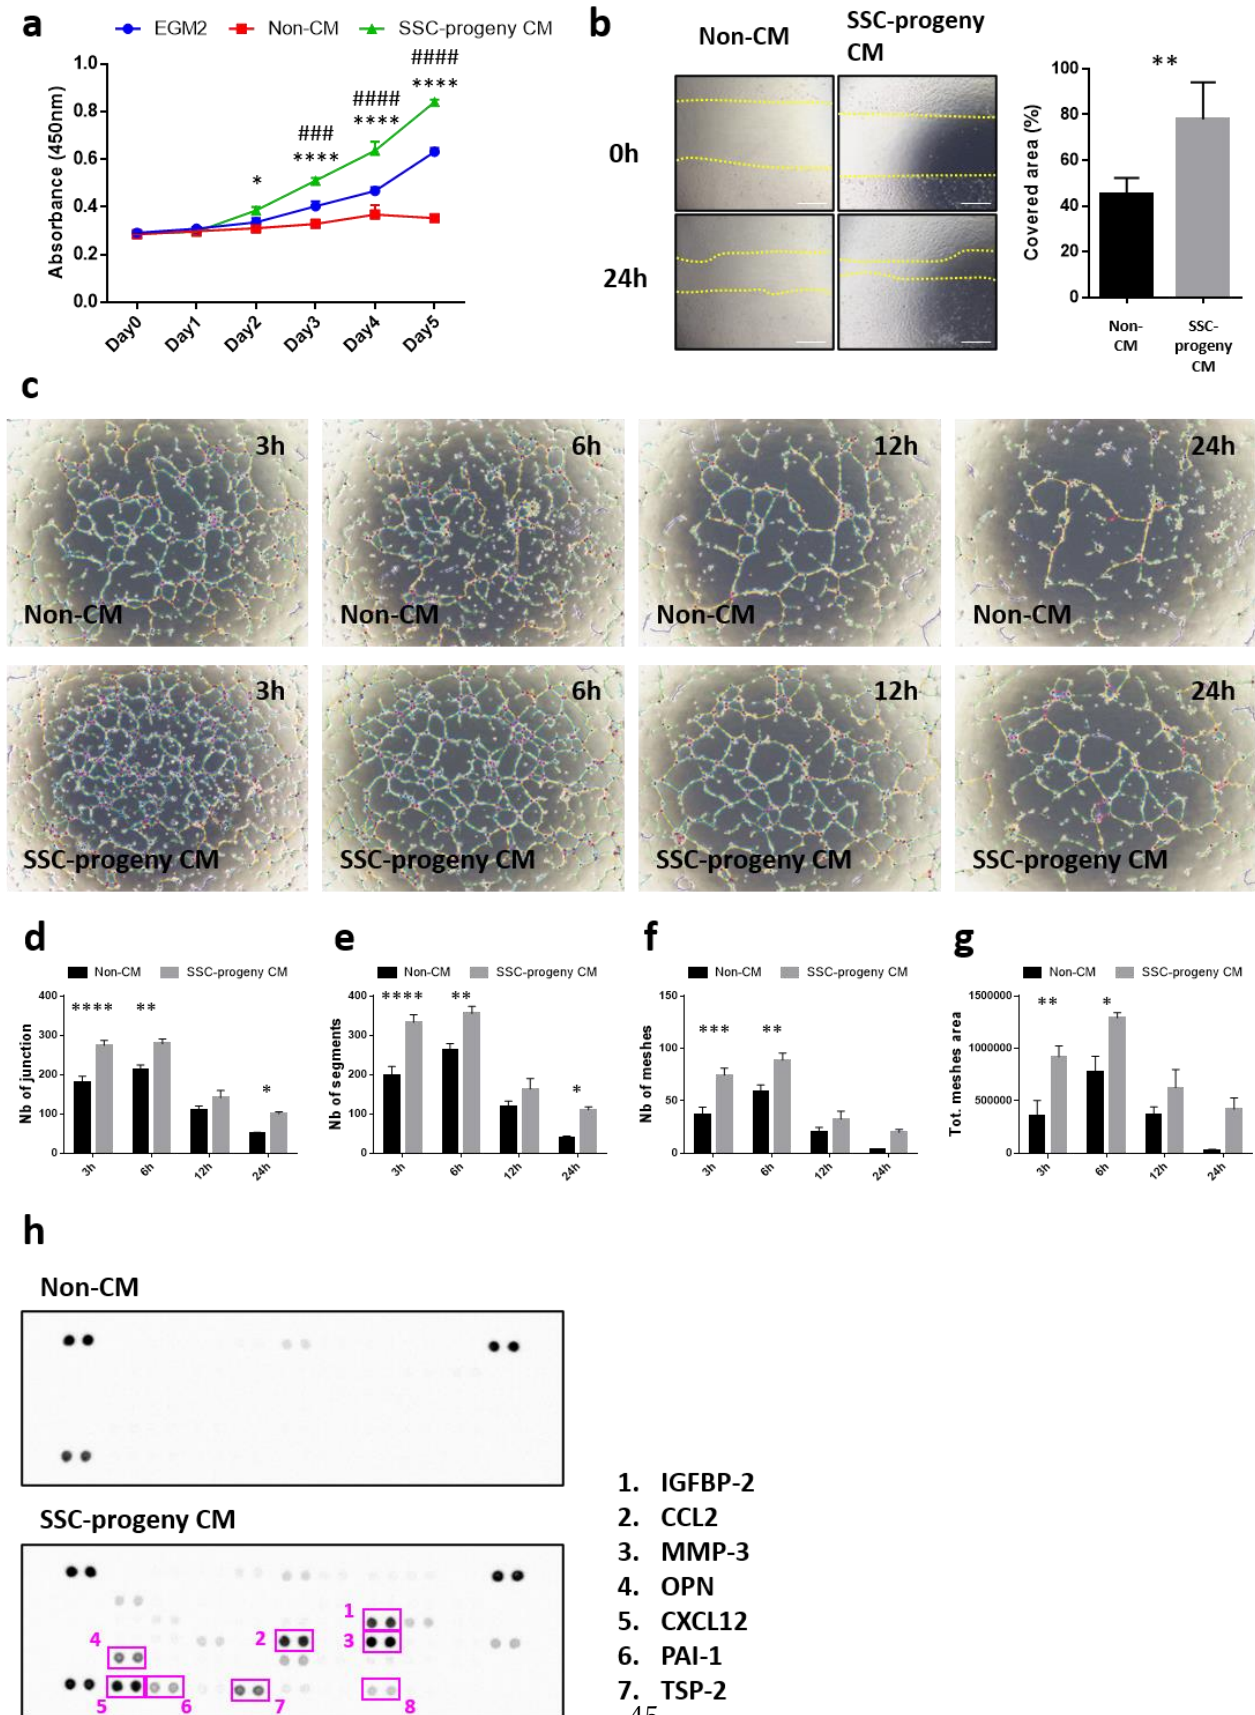

1 **Figure. 6**

2 **PDPN-expressing SSC progenies autonomously release various angiogenic factors that**  
3 **coordinate with each other to maintain HUVEC lumens *in vitro*.** (A) HUVEC proliferation assay.  
4 HUVECs were cultured with the EGM2, non-CM, and SSC-progeny CM media. HUVEC  
5 proliferation was assessed via the WST-8 assay. \* $p < 0.05$  v.s. Non-CM. \*\*\*\* $p < 0.0001$  v.s. Non-  
6 CM. ### $p < 0.001$  v.s. EGM2. ##### $p < 0.0001$  v.s. EGM2. Statistical analysis was performed using  
7 two-way ANOVA and Sidak's multiple comparison test ( $n = 3$  per group). The error bars represent  
8 SEMs. (B) HUVEC scratch assay. The panel on the left indicates the representative optical  
9 microscopic images of scratched HUVEC monolayers cultured with non-CM and SSC-progeny CM  
10 media at 0 h or 24 h. The panel on the right indicates the quantitative data of the covered area, 24 h  
11 after culturing cells with non-CM and SSC-progeny CM media. \*\* $p < 0.01$ , as detected by the  
12 Student's t-test ( $n = 5$  per group). Scale bars indicate 200  $\mu\text{m}$ . (C) Time series images of HUVEC  
13 vascular-like lumens in non-CM (upper panels) and SSC-progeny CM (lower panels) media. (D-G)  
14 Quantitative analysis of HUVEC vascular lumen integrity using non-CM or SSC-progeny CM  
15 media. The parameters used for evaluating lumen vascularization, including the number of junctions  
16 (D), the number of segments (E), the number of meshes (F), and the total mesh area (G), were  
17 measured using the angiogenesis analyzer tool. \* $p < 0.05$ . \*\* $p < 0.01$ . \*\*\* $p < 0.001$ . \*\*\*\* $p < 0.0001$ .  
18 Statistical analysis was performed by two-way ANOVA and Sidak's multiple comparison test ( $n = 5$   
19 per group). The error bars represent SEMs. (H) Profiling the soluble factors to regulate HUVEC  
20 lumen integrity in the SSC-progeny CM medium. The soluble factors were profiled by using the  
21 Proteome Profiler Mouse Angiogenesis Array Kit. The top and bottom panels indicate the array  
22 images generated with non-CM and SSC-progeny CM media, respectively. PDPN: podoplanin, SSC:  
23 skeletal stem cell, HUVEC: human umbilical vein endothelial cell, EGM2: endothelial growth  
24 medium-2, non-CM: EGM2-basal medium supplemented with non-conditioned medium, SSC-  
25 progeny CM: EGM2-basal medium supplemented with *in vitro* PDPN-expressing SSC-progeny  
26 conditioned medium  
27

**Figure 7**

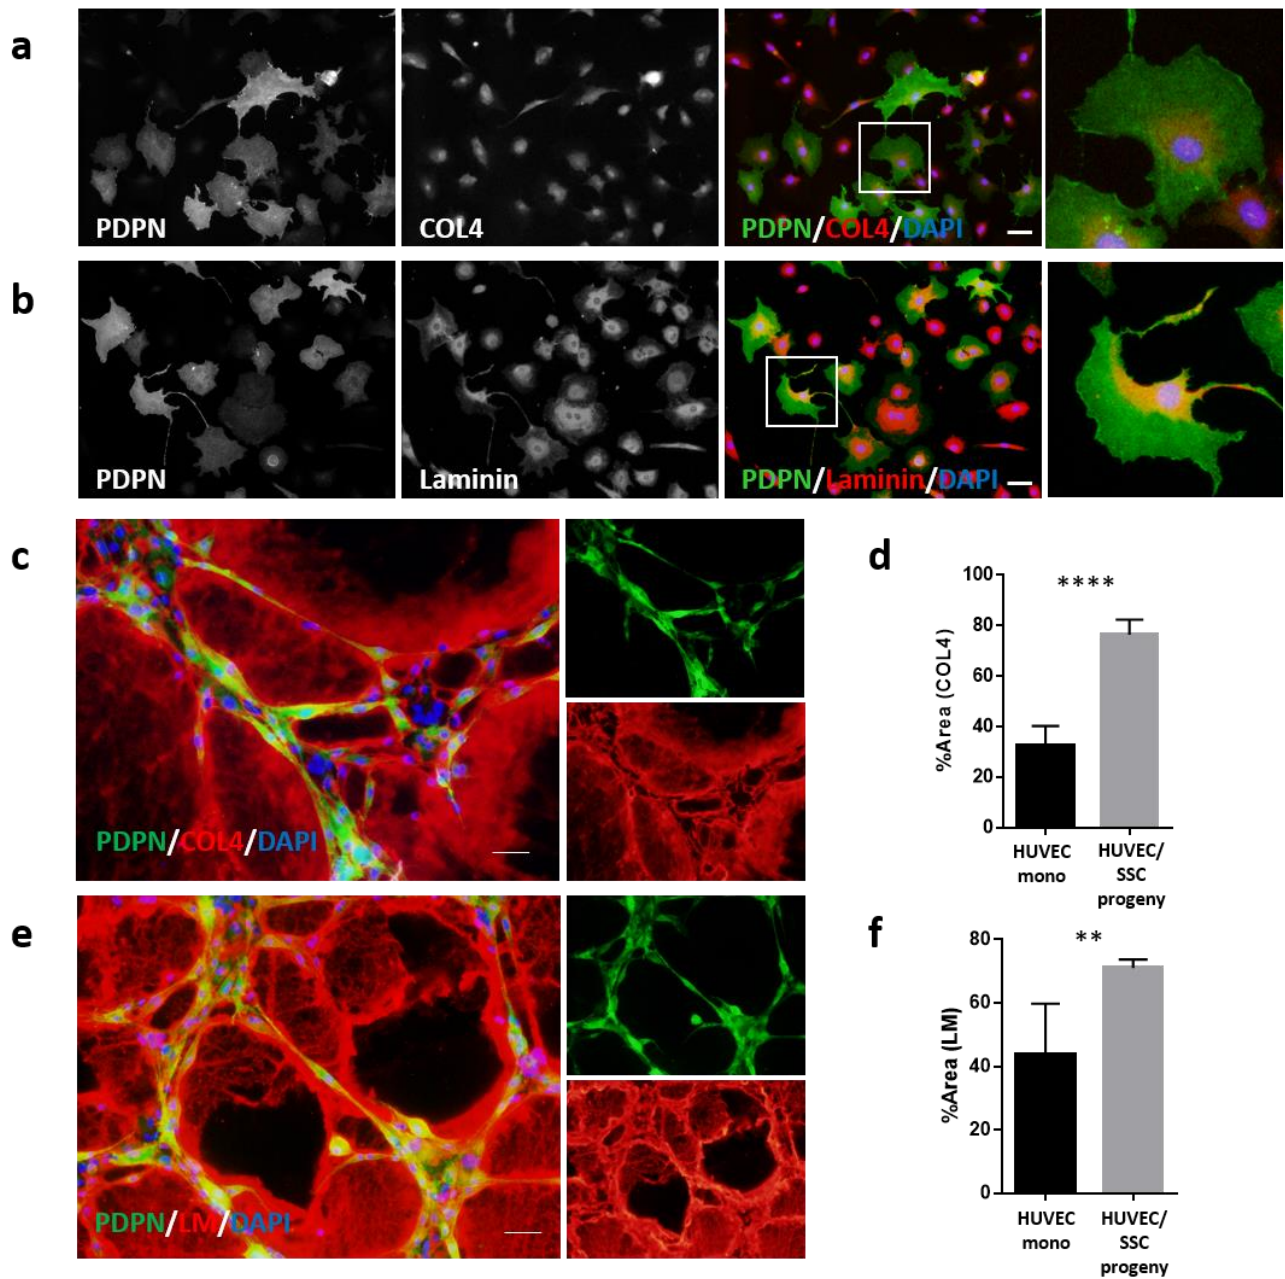

1  
2  
3  
4  
5  
6  
7  
8  
9

1 **Figure. 7**

2 **Cell-cell interactions with HUVECs induce PDPN-expressing SSC progenies to release ECMs**  
3 **in the periluminal space *in vitro*.** (A-B) Representative ICC images of monocultured PDPN-  
4 expressing SSC progenies stained *in vitro* with type IV collagen (A) and laminin isoforms (B). (C-F)  
5 Basement membrane ECM deposition at the periluminal space in the xenovascular model. (C and E)  
6 Representative ICC images of the xenovascular model co-cultured with HUVECs and PDPN-  
7 expressing SSC progenies stained *in vitro* with type IV collagen (C) and laminin isoforms (E). (D  
8 and F) Quantitative area analysis of deposited type IV collagen (D) and laminin isoforms (F) in the  
9 xenovascular model. \*\*p < 0.01. \*\*\*\*p < 0.0001. Statistical analysis was performed using the  
10 Student's t-test (n = 5 per group). The error bars represent SEMs. Scale bars indicate 50  $\mu$ m. ICC:  
11 immunocytochemistry, PDPN: podoplanin, SSC: skeletal stem cell, HUVECs: human umbilical vein  
12 endothelial cells  
13



**Figure 8**

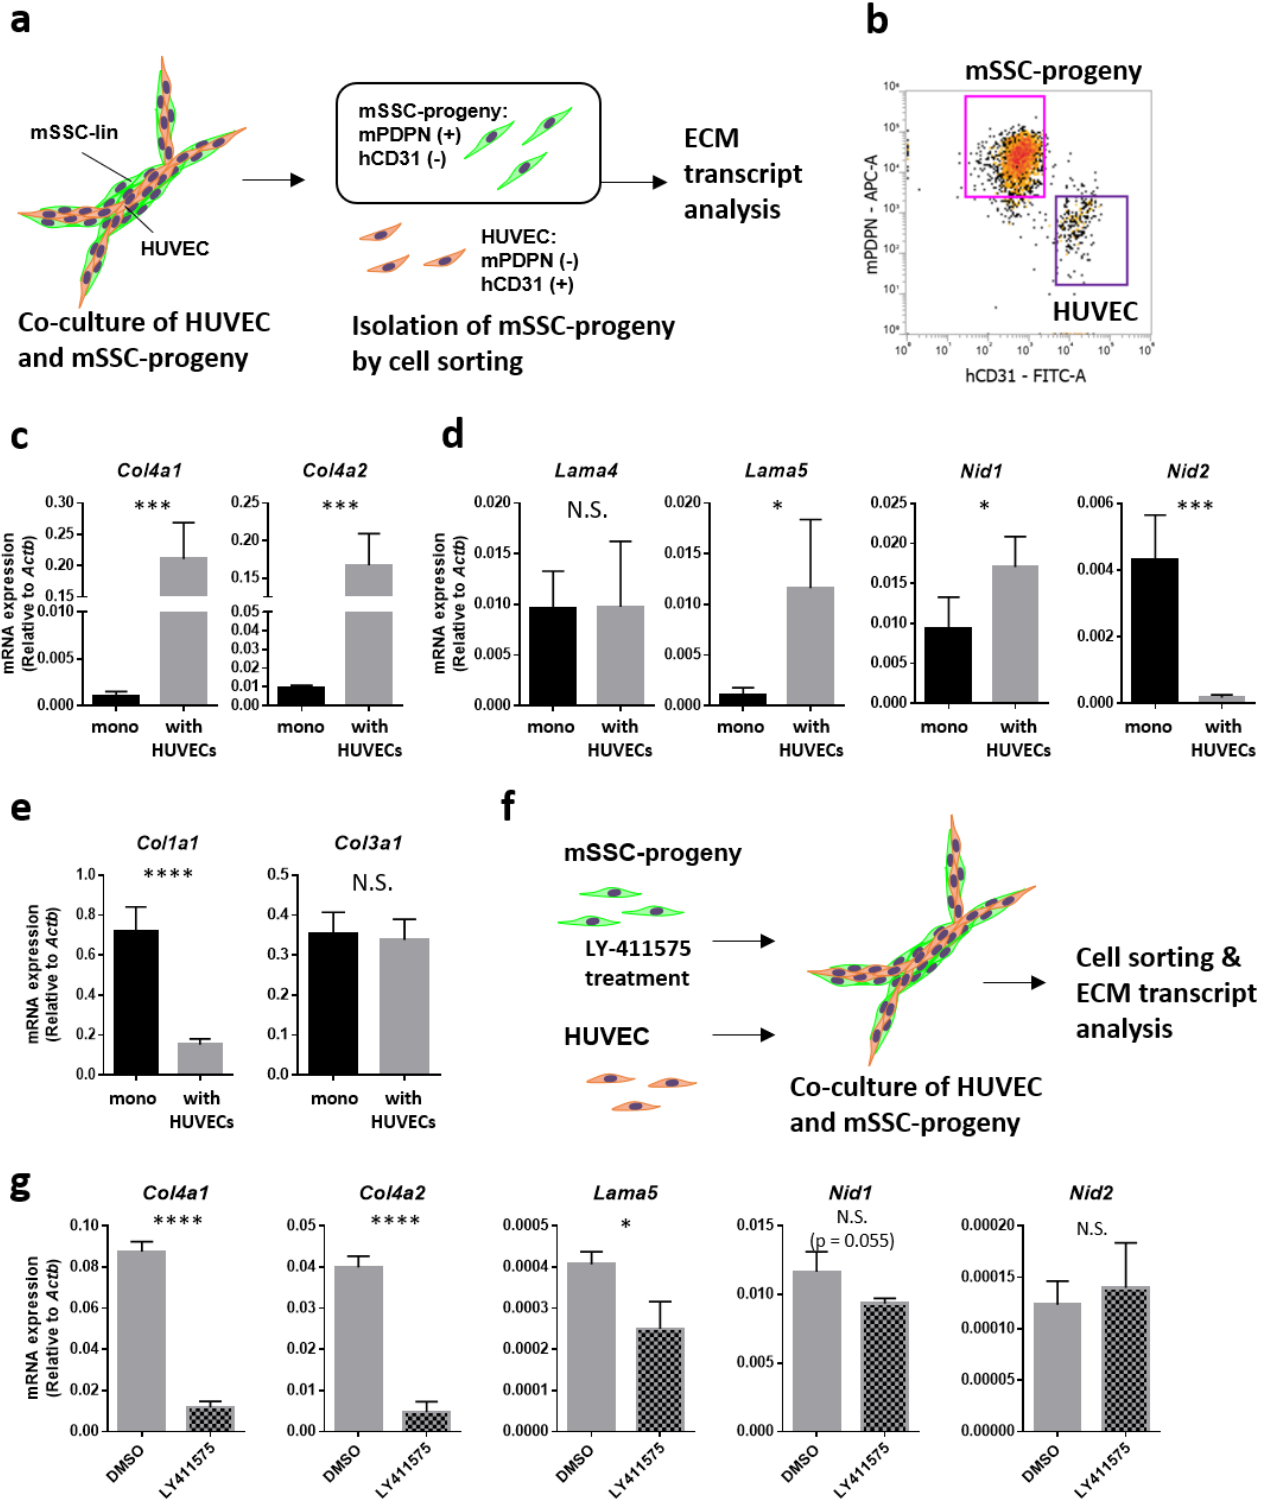

1  
2  
3  
4  
5

1 **Figure. 8**

2 **Notch-associated cell-cell interactions with HUVECs upregulate basement membrane ECM**  
3 **expression of PDPN-expressing SSC progenies *in vitro*.** (A) Strategy for isolating co-cultured  
4 PDPN-expressing SSC progenies in the xenovascular model. (B) Representative flow cytometric  
5 scattergram detecting HUVECs and PDPN-expressing SSC progenies via the staining of human  
6 CD31 and mouse PDPN. Distinctively separated mouse PDPN-expressing SSC progenies were  
7 isolated using the cell sorter. (C) RT-qPCR evaluating the expression of the genes encoding proteins  
8 present in collagenous vascular basement membrane ECMs, such as type IV collagen alpha-chains  
9 (*Col4a1* and *Col4a2*). (D) RT-qPCR evaluating the expression of genes encoding the proteins present  
10 in the non-collagenous vascular basement membrane ECMs, such as laminin alpha-chains (*lama4*  
11 and *lama5*) and nidogen isoforms (*Nid1* and *Nid2*). (E) RT-qPCR evaluating the expression of genes  
12 encoding the proteins present in non-vascular basement membrane ECMs, such as fibrillar type I and  
13 type III collagen (*Colla1* and *Col3a1*). (F) Strategy for experiments involving the xenovascular  
14 model and LY-411575, a Notch pathway inhibitor. Prior to their co-culture with HUVECs, PDPN-  
15 expressing SSC progenies were pre-treated with LY-411575 *in vitro*. Isolated PDPN-expressing SSC  
16 progenies were subjected to ECM transcript analysis. (G) LY-411575 suppresses the basement  
17 membrane ECM up-regulation of PDPN-expressing SSC progenies during cell-cell interactions with  
18 HUVECs. In this experiment, we targeted the ECM genes *Col4a1*, *Col4a2*, *Lama5*, *Nid1*, and *Nid2*,  
19 which were altered during co-culture with HUVECs. \* $p < 0.01$ . \*\* $p < 0.01$ . \*\*\* $p < 0.01$ . \*\*\*\* $p <$   
20  $0.0001$ . N.S. indicates non-significance differences. Statistical analysis was performed by the  
21 Student's t-test ( $n = 5$  per group). The error bars represent SEMs. PDPN: podoplanin, SSC: skeletal  
22 stem cell, HUVECs: human umbilical vein endothelial cells, ECM: extracellular matrix  
23
